# Supplementary material for: SLICER: A Novel Computational Pipeline for Dynamic Analysis of Complex Engineered DNA from Long-Read Sequencing
Source: Research Square preprint supplement (doi:10.21203/rs.3.rs-6778473/v1), 2025-07-11
Supplement: Supplementary file 1 [file 2364a25bbeee2cf95806a931.xlsx]

## Sheet: Dataset1
Reference	Barcode	Barcode Count-REF	Barcode Count-SLOPE	% Diff - REF:SLOPE	Barcode Counts-DISTANCE	% Diff Ref:DISTANCE
Ref1	GTACAGGA	73002	73002	0	74727	-2.3084			% Diff - REF:SLOPE - AVG	0.0126339
Ref2	GTCGGGAA	40408	40408	0	41480	-2.58438			% Diff - REF:SLOPE - SD	0.0666352
Ref4	TCGCCAGA	39641	39641	0	40314	-1.6694
Ref5	ACGCTGTC	37407	37191	0.580786	37721	-0.832428			% Diff Ref:DISTANCE - AVG	-3.25492
Ref6	CTGTAAGT	32537	32537	0	33795	-3.72244			% Diff Ref:DISTANCE - SD	2.15698
Ref3	ACATAGGT	31959	31949	0.0312999	33706	-5.18305
Ref12	GAGGGACA	29680	29680	0	30637	-3.12367
Ref9	ATTGGCAA	29870	29810	0.201275	30483	-2.01096
Ref14	AAAGGGTA	27095	27095	0	27747	-2.3498
Ref7	CGAACAGT	22927	22927	0	24307	-5.67738
Ref18	ATATGGGA	21909	21905	0.0182607	22573	-2.94157
Ref20	TGTACGAC	20118	20118	0	20403	-1.39685
Ref10	GACTCGCA	17373	17368	0.0287886	17732	-2.02459
Ref25	ACGGCGAT	16547	16547	0	17474	-5.30502
Ref13	TGTTCTCG	16908	16911	-0.0177399	17346	-2.52508
Ref27	GAAGCGAT	15584	15587	-0.0192468	16530	-5.72293
Ref8	TGAAGGAT	15597	15597	0	16342	-4.55881
Ref17	GGCTAAGA	15110	15110	0	15606	-3.17826
Ref29	TATGGTGT	13623	13623	0	14585	-6.59582
Ref23	TCGGTTTC	14123	14123	0	14368	-1.70518
Ref11	TTCCTCCG	13855	13830	0.180766	14297	-3.09156
Ref30	GGTTAGCA	13525	13520	0.0369822	14026	-3.57194
Ref21	TCAGGTAC	13338	13328	0.07503	13481	-1.06075
Ref31	CGAACTTC	13181	13181	0	13351	-1.27331
Ref32	TCTAAGGA	13050	13050	0	13255	-1.54659
Ref35	CGTAATAG	12902	12902	0	13201	-2.26498
Ref16	AGGTCTCC	12645	12645	0	12847	-1.57235
Ref15	GGCTCTTG	12280	12280	0	12759	-3.75421
Ref19	ACCACCAC	12490	12490	0	12643	-1.21016
Ref33	TTCAGTAG	12246	12246	0	12598	-2.79409
Ref36	TCGTTTGA	12351	12351	0	12580	-1.82035
Ref38	GCTAGGGT	11586	11586	0	12542	-7.62239
Ref34	CCTGTATG	12039	12029	0.0831324	12346	-2.48664
Ref39	GAGATTGT	11344	11344	0	11991	-5.39571
Ref37	CTGGACAA	11114	11114	0	11311	-1.74167
Ref40	AGGAATGG	10792	10792	0	11297	-4.47021
Ref41	AGGATGCC	10963	10963	0	11199	-2.10733
Ref42	TTACCGGG	10560	10560	0	11128	-5.10424
Ref22	TTGCTAGG	10385	10385	0	10670	-2.67104
Ref43	CGATACGC	10293	10283	0.0972479	10472	-1.70932
Ref45	CGCCACTT	9738	9738	0	10312	-5.56633
Ref44	CACCTCAG	10013	10013	0	10268	-2.48344
Ref24	GGATGAAA	9557	9557	0	9889	-3.35727
Ref46	GTTAATGC	9549	9549	0	9797	-2.53139
Ref47	TCCGTCAA	8877	8877	0	9046	-1.86823
Ref49	TTGCATGT	8557	8557	0	8987	-4.78469
Ref48	GTGGTTCC	8550	8550	0	8703	-1.75801
Ref26	CTGGCTCT	8303	8303	0	8673	-4.26611
Ref50	AACACATC	8434	8440	-0.07109	8566	-1.54098
Ref52	TCCACACC	8347	8347	0	8547	-2.34
Ref51	CTTGCCTC	8374	8374	0	8505	-1.54027
Ref28	CATACTCT	8045	8045	0	8349	-3.64115
Ref54	GAACGATT	7001	7001	0	7585	-7.69941
Ref53	GAACACCG	7055	7055	0	7487	-5.77
Ref56	GGCTTCAA	7202	7202	0	7366	-2.22645
Ref57	ATTACCGA	7110	7110	0	7256	-2.01213
Ref59	AGTTGTTG	6950	6950	0	7138	-2.63379
Ref58	GCAAGAAG	6954	6954	0	7138	-2.57775
Ref61	CGCTTCTG	6731	6731	0	6893	-2.35021
Ref63	CTCCGGTT	6150	6150	0	6881	-10.6235
Ref60	CACTCTCC	6794	6794	0	6874	-1.16381
Ref55	CTAGGATT	5921	5921	0	6385	-7.26703
Ref62	CCAGTCAC	6228	6228	0	6314	-1.36205
Ref64	GAATTCTC	5727	5727	0	5805	-1.34367
Ref65	AGACGCTG	5556	5556	0	5694	-2.4236
Ref66	ATGCACCT	4971	4971	0	5254	-5.38637
Ref67	TACATCTG	4538	4538	0	4672	-2.86815
Ref68	GGTGTCTT	4241	4241	0	4601	-7.82439
Ref69	AACTGAGC	4234	4234	0	4318	-1.94535
Ref70	TCTCTATC	4199	4199	0	4250	-1.2
Ref72	ATCCGACG	2568	2568	0	2686	-4.39315
Ref74	TATCCAGT	2420	2420	0	2584	-6.34675
Ref73	ACGTAGCC	2525	2525	0	2546	-0.824823
Ref75	AGCCTACT	2235	2235	0	2340	-4.48718
Ref71	CATGGAAT	1493	1493	0	1579	-5.44649
Ref76	TATCTGTG	1528	1528	0	1575	-2.98413
Ref77	CCGTATAT	1250	1250	0	1306	-4.2879
Ref78	ATTAGCTG	1168	1168	0	1196	-2.34114
Ref79	TAACCTCA	1109	1109	0	1145	-3.1441
Ref80	CCTGAACC	1084	1084	0	1105	-1.90045
Ref82	CGCAAGCT	1019	1019	0	1092	-6.68498
Ref81	GCTGAAGA	1009	1009	0	1048	-3.72137
Ref83	GAGATAAC	995	995	0	1016	-2.06693
Ref84	CAGTTCCA	981	981	0	984	-0.304878
Ref85	TGTCACCG	922	922	0	982	-6.10998
Ref86	CTGAATCA	892	892	0	915	-2.51366
Ref88	GCCGAATG	860	860	0	908	-5.28634
Ref87	CATGTTGA	874	874	0	890	-1.79775
Ref89	TCACGCTC	760	760	0	769	-1.17035
Ref90	TACTGCAG	734	734	0	743	-1.21131
Ref91	GAACGTAG	692	692	0	728	-4.94505
Ref92	ACCTTGAA	644	644	0	656	-1.82927
Ref93	ATAGAGTC	601	601	0	604	-0.496689
Ref94	AGGACGGT	378	378	0	426	-11.2676
Ref95	GCATCACG	372	372	0	384	-3.125
Ref96	AGTCCGAA	173	173	0	173	0
Ref97	AGAATCTC	3	3	0	3	0

## Sheet: Dataset2
Reference	Barcode	Barcode Count - REF	Barcode Count-SLOPE	% Diff - REF:SLOPE	Barcode Counts-DISTANCE	% Diff Ref:DISTANCE
H05	GTACAGGA	7732	7560	2.27513	7560	2.27513			% Diff - REF:SLOPE - AVG	3.34694
H04	GTCGGGAA	4225	4105	2.92326	4105	2.92326			% Diff - REF:SLOPE - SD	3.00792
G05	TCGCCAGA	3872	3797	1.97524	3797	1.97524
D05	ACGCTGTC	3825	3757	1.80995	3757	1.80995			% Diff Ref:DISTANCE - AVG	3.34694
H06	ACATAGGT	3642	3480	4.65517	3480	4.65517			% Diff Ref:DISTANCE - SD	3.00792
F05	CTGTAAGT	3420	3274	4.45938	3274	4.45938
D06	ATTGGCAA	3277	3196	2.53442	3196	2.53442
H11	GAGGGACA	3181	3065	3.78467	3065	3.78467
H02	AAAGGGTA	2941	2886	1.90575	2886	1.90575
C05	CGAACAGT	2518	2359	6.74014	2359	6.74014
F04	TGTACGAC	2148	2118	1.41643	2118	1.41643
G11	ATATGGGA	2116	2056	2.91829	2056	2.91829
G06	GACTCGCA	1991	1953	1.94572	1953	1.94572
H08	ACGGCGAT	1823	1736	5.01152	1736	5.01152
H03	GGCTAAGA	1690	1642	2.92326	1642	2.92326
E05	TGTTCTCG	1663	1626	2.27552	1626	2.27552
H01	GAAGCGAT	1651	1555	6.17363	1555	6.17363
D08	TGAAGGAT	1617	1553	4.12106	1553	4.12106
E06	TTCCTCCG	1541	1493	3.215	1493	3.215
H12	TCGGTTTC	1528	1517	0.725115	1517	0.725115
C02	TATGGTGT	1509	1394	8.24964	1394	8.24964
F06	TCAGGTAC	1488	1461	1.84805	1461	1.84805
C11	CGTAATAG	1487	1447	2.76434	1447	2.76434
C06	GGTTAGCA	1483	1432	3.56145	1432	3.56145
E02	ACCACCAC	1415	1403	0.85531	1403	0.85531
D02	CGAACTTC	1408	1404	0.2849	1404	0.2849
C04	GGCTCTTG	1362	1312	3.81098	1312	3.81098
E12	CCTGTATG	1311	1290	1.62791	1290	1.62791
H10	TCGTTTGA	1300	1282	1.40406	1282	1.40406
E01	AGGAATGG	1286	1242	3.54267	1242	3.54267
F02	AGGTCTCC	1271	1247	1.92462	1247	1.92462
D01	TCTAAGGA	1270	1249	1.68135	1249	1.68135
G08	GAGATTGT	1252	1188	5.38721	1188	5.38721
E04	CGATACGC	1252	1217	2.87592	1217	2.87592
H07	GCTAGGGT	1218	1134	7.40741	1134	7.40741
G04	CTGGACAA	1177	1162	1.29088	1162	1.29088
G02	CGCCACTT	1170	1086	7.73481	1086	7.73481
D11	TTCAGTAG	1152	1136	1.40845	1136	1.40845
G12	TTACCGGG	1106	1055	4.83412	1055	4.83412
H09	GGATGAAA	1064	1028	3.50195	1028	3.50195
C08	TTGCTAGG	1055	1015	3.94089	1015	3.94089
D12	AGGATGCC	1043	1025	1.7561	1025	1.7561
E03	TTGCATGT	999	967	3.3092	967	3.3092
E11	CTTGCCTC	972	952	2.10084	952	2.10084
C10	CACCTCAG	965	953	1.25918	953	1.25918
C12	GTTAATGC	951	942	0.955414	942	0.955414
E10	TCCGTCAA	917	902	1.66297	902	1.66297
C03	CTGGCTCT	886	844	4.9763	844	4.9763
C01	GTGGTTCC	870	858	1.3986	858	1.3986
G01	TCCACACC	863	834	3.47722	834	3.47722
D03	ATTACCGA	839	828	1.3285	828	1.3285
F08	GCAAGAAG	828	820	0.97561	820	0.97561
F01	GAACGATT	791	731	8.20793	731	8.20793
D10	CATACTCT	778	760	2.36842	760	2.36842
G03	GAACACCG	772	733	5.3206	733	5.3206
G10	AACACATC	762	741	2.83401	741	2.83401
C09	CTCCGGTT	740	680	8.82353	680	8.82353
F11	GGCTTCAA	716	696	2.87356	696	2.87356
D04	AGTTGTTG	707	686	3.06122	686	3.06122
D07	CTAGGATT	699	636	9.90566	636	9.90566
E09	CGCTTCTG	698	674	3.56083	674	3.56083
E08	CACTCTCC	692	684	1.16959	684	1.16959
F10	CCAGTCAC	690	666	3.6036	666	3.6036
F03	GGTGTCTT	589	547	7.67824	547	7.67824
C07	AGACGCTG	534	513	4.09357	513	4.09357
G07	TACATCTG	491	468	4.91453	468	4.91453
F12	GAATTCTC	485	464	4.52586	464	4.52586
A05	ATGCACCT	452	412	9.70874	412	9.70874
G09	AACTGAGC	444	429	3.4965	429	3.4965
E07	TCTCTATC	444	444	0	444	0
F09	ACGTAGCC	297	297	0	297	0
F07	ATCCGACG	276	270	2.22222	270	2.22222
A02	TATCCAGT	255	243	4.93827	243	4.93827
A04	AGCCTACT	215	207	3.86473	207	3.86473
A06	CATGGAAT	168	156	7.69231	156	7.69231
A11	TATCTGTG	156	148	5.40541	148	5.40541
A08	CCGTATAT	148	144	2.77778	144	2.77778
A10	CGCAAGCT	132	120	10	120	10
B06	TCACGCTC	99	99	0	99	0
A07	CAGTTCCA	99	99	0	99	0
B05	ATTAGCTG	96	96	0	96	0
B11	TGTCACCG	92	84	9.52381	84	9.52381
A09	GCTGAAGA	92	92	0	92	0
A01	CCTGAACC	92	92	0	92	0
A03	GAGATAAC	90	90	0	90	0
B08	CTGAATCA	84	84	0	84	0
B10	GAACGTAG	81	75	8	75	8
B02	CATGTTGA	80	80	0	80	0
B01	TACTGCAG	72	72	0	72	0
A12	GCCGAATG	57	57	0	57	0
B04	TAACCTCA	48	48	0	48	0
B03	ATAGAGTC	48	48	0	48	0
B12	ACCTTGAA	45	42	7.14286	42	7.14286
B09	AGGACGGT	42	36	16.6667	36	16.6667
B07	GCATCACG	36	36	0	36	0
D09	AGTCCGAA	15	15	0	15	0

## Sheet: Dataset3
Reference	Barcode	Barcode Count - REF	Barcode Count-SLOPE	% Diff - REF:SLOPE	Barcode Counts-DISTANCE	% Diff Ref:DISTANCE
H05	GTACAGGA	51149	51149	0	51149	0			% Diff - REF:SLOPE - AVG	-1.045
H04	GTCGGGAA	28965	28965	0	28965	0			% Diff - REF:SLOPE - SD	10.1508
G05	TCGCCAGA	27807	27807	0	27807	0
D05	ACGCTGTC	26234	26102	0.505708	26102	0.505708			% Diff Ref:DISTANCE - AVG	-1.045
F05	CTGTAAGT	23471	23471	0	23471	0			% Diff Ref:DISTANCE - SD	10.1508
H06	ACATAGGT	22383	22368	0.0670601	22368	0.0670601
H11	GAGGGACA	21160	21160	0	21160	0
D06	ATTGGCAA	20986	20961	0.119269	20961	0.119269
H02	AAAGGGTA	18859	18859	0	18859	0
C05	CGAACAGT	15727	15727	0	15727	0
G11	ATATGGGA	15241	15241	0	15241	0
F04	TGTACGAC	14374	14374	0	14374	0
G06	GACTCGCA	12500	12495	0.040016	12495	0.040016
E05	TGTTCTCG	12073	12050	0.190871	12050	0.190871
H08	ACGGCGAT	11496	11496	0	11496	0
D08	TGAAGGAT	11153	11153	0	11153	0
H01	GAAGCGAT	10931	10931	0	10931	0
H03	GGCTAAGA	10543	10543	0	10543	0
H12	TCGGTTTC	9922	9922	0	9922	0
E06	TTCCTCCG	9912	9902	0.10099	9902	0.10099
C06	GGTTAGCA	9757	9757	0	9757	0
F06	TCAGGTAC	9436	9436	0	9436	0
C02	TATGGTGT	9398	9398	0	9398	0
C11	CGTAATAG	9218	9218	0	9218	0
D01	TCTAAGGA	9034	9034	0	9034	0
D02	CGAACTTC	9011	9011	0	9011	0
E02	ACCACCAC	8992	8992	0	8992	0
D11	TTCAGTAG	8786	8786	0	8786	0
H10	TCGTTTGA	8672	8672	0	8672	0
C04	GGCTCTTG	8656	8656	0	8656	0
F02	AGGTCTCC	8644	8644	0	8644	0
E12	CCTGTATG	8415	8410	0.059453	8410	0.059453
G08	GAGATTGT	8030	8030	0	8030	0
E01	AGGAATGG	7984	7984	0	7984	0
H07	GCTAGGGT	7897	7897	0	7897	0
G04	CTGGACAA	7800	7800	0	7800	0
D12	AGGATGCC	7796	7796	0	7796	0
E04	CGATACGC	7549	7549	0	7549	0
C08	TTGCTAGG	7268	7268	0	7268	0
G12	TTACCGGG	7253	7253	0	7253	0
C10	CACCTCAG	6991	6991	0	6991	0
H09	GGATGAAA	6752	6752	0	6752	0
G02	CGCCACTT	6634	6634	0	6634	0
C12	GTTAATGC	6569	6569	0	6569	0
E03	TTGCATGT	6337	6337	0	6337	0
C01	GTGGTTCC	6135	6138	-0.0488759	6138	-0.0488759
E10	TCCGTCAA	6029	6029	0	6029	0
E11	CTTGCCTC	5975	5975	0	5975	0
C03	CTGGCTCT	5828	5828	0	5828	0
G10	AACACATC	5715	5715	0	5715	0
G01	TCCACACC	5620	5620	0	5620	0
D10	CATACTCT	5573	5573	0	5573	0
D03	ATTACCGA	5237	5237	0	5237	0
F11	GGCTTCAA	5071	5071	0	5071	0
F01	GAACGATT	5037	5037	0	5037	0
D04	AGTTGTTG	4980	4980	0	4980	0
F08	GCAAGAAG	4847	4847	0	4847	0
G03	GAACACCG	4788	4788	0	4788	0
E08	CACTCTCC	4678	4678	0	4678	0
C09	CTCCGGTT	4659	4659	0	4659	0
E09	CGCTTCTG	4504	4504	0	4504	0
F10	CCAGTCAC	4472	4472	0	4472	0
D07	CTAGGATT	4365	4365	0	4365	0
C07	AGACGCTG	4004	4004	0	4004	0
F12	GAATTCTC	3725	3725	0	3725	0
A05	ATGCACCT	3631	3631	0	3631	0
E07	TCTCTATC	3271	3271	0	3271	0
G07	TACATCTG	3098	3098	0	3098	0
G09	AACTGAGC	3068	3068	0	3068	0
F03	GGTGTCTT	3050	3050	0	3050	0
F09	ACGTAGCC	1990	1990	0	1990	0
F07	ATCCGACG	1774	1774	0	1774	0
A02	TATCCAGT	1586	1590	-0.251572	1590	-0.251572
A04	AGCCTACT	1573	1573	0	1573	0
A11	TATCTGTG	1012	1012	0	1012	0
A06	CATGGAAT	952	952	0	952	0
A08	CCGTATAT	839	839	0	839	0
A10	CGCAAGCT	789	789	0	789	0
A01	CCTGAACC	776	776	0	776	0
B05	ATTAGCTG	758	758	0	758	0
B02	CATGTTGA	744	744	0	744	0
B04	TAACCTCA	708	708	0	708	0
H06	ACATAGGTT	705	705	0	705	0
A03	GAGATAAC	678	678	0	678	0
A07	CAGTTCCA	651	651	0	651	0
H05	GTACAGGAT	644	644	0	644	0
C05	CGAACAGTT	638	638	0	638	0
B11	TGTCACCG	636	636	0	636	0
B08	CTGAATCA	636	636	0	636	0
A09	GCTGAAGA	630	630	0	630	0
B10	GAACGTAG	508	508	0	508	0
B12	ACCTTGAA	495	495	0	495	0
C02	TATGGTGTT	494	494	0	494	0
B01	TACTGCAG	491	491	0	491	0
F05	CTGTAAGTT	483	483	0	483	0
A12	GCCGAATG	473	473	0	473	0
B06	TCACGCTC	446	446	0	446	0
B03	ATAGAGTC	423	423	0	423	0
E05	TGTTCTCGT	317	317	0	317	0
G05	TCGCCAGAT	315	315	0	315	0
B09	AGGACGGT	311	311	0	311	0
F05	CTGTAAG	299	299	0	299	0
G08	GAGATTGTT	292	292	0	292	0
H07	GCTAGGGTT	290	290	0	290	0
H06	ACATAGG	276	276	0	276	0
H04	GTCGGGAAT	271	271	0	271	0
H04	GTCGGAA	266	266	0	266	0
H01	GAAGCGATT	264	264	0	264	0
D06	ATTGGCAAT	264	264	0	264	0
B07	GCATCACG	264	264	0	264	0
D08	TGAAGGATT	252	252	0	252	0
C11	CGTAATAGT	248	248	0	248	0
H08	ACGGCGATT	247	247	0	247	0
H02	AAAGGGTAT	241	241	0	241	0
C09	CTCCGGTTT	237	237	0	237	0
G11	ATATGGGAT	232	232	0	232	0
E01	AGGAATGGT	218	218	0	218	0
H01	GAAGCGA	217	217	0	217	0
H11	GAGGGACAT	206	206	0	206	0
D11	TTCAGTAGT	204	204	0	204	0
G12	TTACCGGGT	200	200	0	200	0
E06	TTCCTCCGT	200	200	0	200	0
D05	ACGCTGTCT	195	195	0	195	0
G03	GAACACCGT	190	190	0	190	0
G02	CGCCACT	188	188	0	188	0
G06	GACTCGCAT	185	185	0	185	0
H08	ACGGCGA	182	182	0	182	0
E03	TTGCATGTT	176	176	0	176	0
E12	CCTGTATGT	172	172	0	172	0
D08	TGAAGGA	163	163	0	163	0
C05	CGAACAG	163	163	0	163	0
C04	GGCTCTTGT	160	160	0	160	0
F04	TGTACGACT	154	154	0	154	0
C06	GGTTAGCAT	153	153	0	153	0
G02	CGCCACTTT	152	152	0	152	0
D09	AGTCCGAA	150	150	0	150	0
H03	GCTAAGA	149	149	0	149	0
H05	TACAGGA	142	142	0	142	0
G11	ATATGGA	142	142	0	142	0
G04	CTGGACAAT	136	136	0	136	0
D12	AGGATGCCT	135	135	0	135	0
F01	GAACGATTT	134	134	0	134	0
D01	TCTAAGGAT	132	132	0	132	0
C08	TTGCTAGGT	132	132	0	132	0
H11	AGGGACA	131	131	0	131	0
H09	GATGAAA	131	131	0	131	0
H07	GCTAGGG	126	126	0	126	0
C02	TATGGTG	125	125	0	125	0
H11	GAGGACA	123	123	0	123	0
D10	CATACTC	123	123	0	123	0
C12	GTTAATGCT	123	123	0	123	0
C03	CTGGCTC	120	120	0	120	0
F06	TCAGGTACT	116	116	0	116	0
D07	CTAGGATTT	113	113	0	113	0
F01	GAACGAT	111	111	0	111	0
H03	GGCTAAGAT	108	108	0	108	0
G08	GAGATTG	108	108	0	108	0
C04	GCTCTTG	108	108	0	108	0
D10	CATACTCTT	104	104	0	104	0
D04	AGTTGTTGT	104	104	0	104	0
H10	TCGTTTGAT	102	102	0	102	0
C07	AGACGCTGT	102	102	0	102	0
F03	GGTGTCT	101	101	0	101	0
E02	ACCACCACT	99	99	0	99	0
C06	GTTAGCA	99	99	0	99	0
A05	ATGCACCTT	99	99	0	99	0
F02	AGGTCTCCT	94	94	0	94	0
C10	CACCTCAGT	93	93	0	93	0
F11	GCTTCAA	92	92	0	92	0
E04	CGATACGCT	92	92	0	92	0
H09	GGATGAAAT	90	90	0	90	0
H11	GAGGGGACA	83	83	0	83	0
C03	CTGGCTCTT	81	81	0	81	0
G12	TTACCGG	78	78	0	78	0
G07	TACATCTGT	75	75	0	75	0
D07	CTAGGAT	74	74	0	74	0
C09	CTCCGGT	73	73	0	73	0
H01	AAGCGAT	72	72	0	72	0
G06	ACTCGCA	72	72	0	72	0
E10	TCCGTCAAT	72	72	0	72	0
E09	CGCTTCTGT	72	72	0	72	0
G01	TCCACACCT	68	68	0	68	0
E11	CTTGCCTCT	68	68	0	68	0
F03	GGTGTCTTT	66	66	0	66	0
E03	TTGCATG	66	66	0	66	0
D06	ATTGCAA	63	63	0	63	0
H04	TCGGGAA	62	62	0	62	0
H05	GTACAGA	51	51	0	51	0
G10	AACACATCT	51	51	0	51	0
E08	CACTCTCCT	51	51	0	51	0
D02	CGAACTTCT	51	51	0	51	0
C01	GTGGTTCCT	51	51	0	51	0
H08	ACGGGCGAT	48	48	0	48	0
G12	TTACCCGGG	48	48	0	48	0
F07	ATCCGACGT	48	48	0	48	0
A11	TATCTGTGT	48	48	0	48	0
A02	TATCCAGTT	48	48	0	48	0
F11	GGCTTCAAT	47	47	0	47	0
F08	GCAAGAAGT	47	47	0	47	0
H04	GTCGGGGAA	45	45	0	45	0
G09	AACTGAGCT	45	45	0	45	0
H12	TCGGTTTCT	44	44	0	44	0
F12	GAATTCTCT	44	44	0	44	0
G08	AGATTGT	40	40	0	40	0
A05	ATGCACC	40	40	0	40	0
H06	ACATAGT	39	39	0	39	0
F10	CCAGTCACT	39	39	0	39	0
D06	ATGGCAA	39	39	0	39	0
H07	GCTAGGT	36	36	0	36	0
H02	AAGGGTA	36	36	0	36	0
H02	AAAGGGGTA	36	36	0	36	0
G03	AACACCG	36	36	0	36	0
D03	ATTACCGAT	36	36	0	36	0
F03	GTGTCTT	33	33	0	33	0
A04	AGCCTAC	33	33	0	33	0
F08	CAAGAAG	32	32	0	32	0
F09	ACGTAGCCT	30	30	0	30	0
A04	AGCCTACTT	30	30	0	30	0
G01	TCCCACACC	29	29	0	29	0
A02	TATCCAG	28	28	0	28	0
H10	TCGTTGA	27	27	0	27	0
H07	CTAGGGT	27	27	0	27	0
F01	AACGATT	27	27	0	27	0
E04	CGATAACGC	27	27	0	27	0
H12	TCGGTTC	24	24	0	24	0
H05	GTACAGGGA	24	24	0	24	0
D06	ATTGGCA	24	24	0	24	0
B11	TGTCACCGT	24	24	0	24	0
A12	GCCGAATGT	24	24	0	24	0
A10	CGCAAGCTT	24	24	0	24	0
A10	CGCAAGC	24	24	0	24	0
A06	CATGGAATT	24	24	0	24	0
F12	AATTCTC	23	23	0	23	0
G12	TTACCGGGG	21	21	0	21	0
C12	TTAATGC	21	21	0	21	0
H02	AAAGGTA	20	20	0	20	0
D08	TGAAGTAT	20	20	0	20	0
D05	ACGCTGTCC	20	20	0	20	0
C06	GGGTTAGCA	20	20	0	20	0
A08	CCGTATATT	20	20	0	20	0
F02	AGGTCCTCC	19	19	0	19	0
E11	CTTGCCCTC	19	19	0	19	0
B08	CTGAATCAT	19	19	0	19	0
H12	TCGGTTTTC	18	18	0	18	0
H04	GTCTGGAA	18	18	0	18	0
H04	GGTCGGGAA	18	18	0	18	0
G01	TCCACAACC	18	18	0	18	0
E07	TCTCTATCT	18	18	0	18	0
E06	TTCCTCG	18	18	0	18	0
E01	AGGAATGGG	18	18	0	18	0
D06	ATTGGGCAA	18	18	0	18	0
C01	TGGTTCC	18	18	0	18	0
B10	GAACGTAGT	18	18	0	18	0
B09	AGGACGGTT	18	18	0	18	0
B05	ATTAGCTGT	18	18	0	18	0
A06	CATGGAA	18	18	0	18	0
H05	GTTACAGGA	16	16	0	16	0
H05	GGTACAGGA	16	16	0	16	0
G05	TCGCAGA	16	16	0	16	0
G05	TCCCCAGA	16	16	0	16	0
E05	TGTTTCTCG	16	16	0	16	0
E02	ACCCACCAC	16	16	0	16	0
D05	ACGGTGTC	16	16	0	16	0
C08	TTGCTAG	16	16	0	16	0
C02	TATGTGT	16	16	0	16	0
H11	GGAGGGACA	15	15	0	15	0
H09	GGATGAA	15	15	0	15	0
H07	GCTAGGTT	15	15	0	15	0
F08	GGCAAGAAG	15	15	0	15	0
F06	TCAGATAC	15	15	0	15	0
F01	GAACGATTTT	15	15	0	15	0
E06	TTCCCTCCG	15	15	0	15	0
C03	CTGCTCT	15	15	0	15	0
H11	GAGGGACCA	12	12	0	12	0
H07	GCTAGGGGT	12	12	0	12	0
H06	ACATAGGTTT	12	12	0	12	0
H05	GTACATGA	12	12	0	12	0
H05	GTAACAGGA	12	12	0	12	0
H05	AAAGGGTA	12	18859	-99.9364	18859	-99.9364
H04	GTCGGGA	12	12	0	12	0
H04	GTCGGAAA	12	12	0	12	0
H04	GTCCGGGAA	12	12	0	12	0
H04	ATCGGGAA	12	12	0	12	0
G12	TTTACCGGG	12	12	0	12	0
G05	TCGCCGGA	12	12	0	12	0
G05	TCGCCCAGA	12	12	0	12	0
G02	CGCACTT	12	12	0	12	0
G01	TCCACAC	12	12	0	12	0
F03	GGGTGTCTT	12	12	0	12	0
E08	CACTCTCCC	12	12	0	12	0
E02	ACCACACAC	12	12	0	12	0
E01	AGAATGG	12	12	0	12	0
D08	TGAAGGGAT	12	12	0	12	0
D05	GACGCTGTC	12	12	0	12	0
D05	ACCGCTGTC	12	12	0	12	0
D01	TCTAAGA	12	12	0	12	0
C11	CGGTAATAG	12	12	0	12	0
C10	CACCTCAGTT	12	12	0	12	0
C10	CACCCTCAG	12	12	0	12	0
C09	CTCGGTT	12	12	0	12	0
C05	CGACAGT	12	12	0	12	0
B12	ACCTTGAAT	12	12	0	12	0
B09	AGGACGG	12	12	0	12	0
A12	CCGAATG	12	12	0	12	0
A08	CCGTATA	12	12	0	12	0
A05	TATCCAGT	12	1590	-99.2453	1590	-99.2453
A02	TATCCAGTTT	12	12	0	12	0
H06	ACATAGTT	11	11	0	11	0
G12	TTACCGGGTT	11	11	0	11	0
E02	ACCACCCAC	11	11	0	11	0
D12	AGGATGC	11	11	0	11	0
C05	CGAACAGTTT	11	11	0	11	0
H07	GCTAGGGTTT	9	9	0	9	0
H06	GACATAGGT	9	9	0	9	0
H06	ACATAGGGT	9	9	0	9	0
H04	TTCGGGAA	9	9	0	9	0
H03	GGCTAGA	9	9	0	9	0
G12	TTACGGG	9	9	0	9	0
G06	GGACTCGCA	9	9	0	9	0
G03	GAAACACCG	9	9	0	9	0
F10	CAGTCAC	9	9	0	9	0
F04	TTGTACGAC	9	9	0	9	0
E12	CTGTATG	9	9	0	9	0
E10	TCCCGTCAA	9	9	0	9	0
E06	TTTCCTCCGT	9	9	0	9	0
E06	TTCTCCG	9	9	0	9	0
E06	TTCCTTCG	9	9	0	9	0
E06	TTCCTTCCG	9	9	0	9	0
E06	TTCCTCCCG	9	9	0	9	0
E06	TTCCCTCCGT	9	9	0	9	0
E06	TCCTCCG	9	9	0	9	0
E01	AGGAATGGTT	9	9	0	9	0
D07	CTAGGATTTT	9	9	0	9	0
D07	CTAGATT	9	9	0	9	0
C10	CACCTCAT	9	9	0	9	0
C09	CTCCGGTTTT	9	9	0	9	0
C04	GTGGTTCC	9	6138	-99.8534	6138	-99.8534
C04	GGGCTCTTG	9	9	0	9	0
B07	GCATCACGT	9	9	0	9	0
B04	TAACCTCAT	9	9	0	9	0
B01	TACTGCAGT	9	9	0	9	0
A06	CATGAAT	9	9	0	9	0
A01	CCTGAACCT	9	9	0	9	0
H11	GAGGGGACAT	8	8	0	8	0
H11	GAGGGACATT	8	8	0	8	0
H11	GAGGGACAA	8	8	0	8	0
H05	TACAGGAT	8	8	0	8	0
H05	GTACAGGT	8	8	0	8	0
H05	GTACAAGGA	8	8	0	8	0
H02	AAAGGGTTA	8	8	0	8	0
H02	AAAAGGGTA	8	8	0	8	0
G05	TCGGCCAGA	8	8	0	8	0
G02	CGCCCACTT	8	8	0	8	0
F11	GTCTTCAA	8	8	0	8	0
F11	GGCTTTCAA	8	8	0	8	0
F11	GGCTTCA	8	8	0	8	0
F08	GCAAGAG	8	8	0	8	0
F08	GCAAAGAAG	8	8	0	8	0
F08	ACAAGAAG	8	8	0	8	0
F05	CTGTAAGA	8	8	0	8	0
E08	CACTCCTCC	8	8	0	8	0
E06	TTCCTCGT	8	8	0	8	0
E05	TTGTTCTCG	8	8	0	8	0
E02	ACCACAC	8	8	0	8	0
D11	TTTCAGTAG	8	8	0	8	0
D08	TGAGGAT	8	8	0	8	0
D05	ACGGCTGTC	8	8	0	8	0
D05	ACGCTTGTC	8	8	0	8	0
D05	ACGCCTGTC	8	8	0	8	0
C11	GCGTAATAG	8	8	0	8	0
C08	TTTGCTAGG	8	8	0	8	0
C08	TTGCTAGGTT	8	8	0	8	0
C05	GCGAACAGT	8	8	0	8	0
C05	CGAAACAGTT	8	8	0	8	0
C05	CGAAACAGT	8	8	0	8	0
C05	CCGAACAGT	8	8	0	8	0
H11	AGGGACAT	7	7	0	7	0
H05	GTACAGGGAT	7	7	0	7	0
F05	CTGTAAGTTT	7	7	0	7	0
E08	CACTCGTCC	7	7	0	7	0
E05	TGTTCTCGTT	7	7	0	7	0
E02	ACACCAC	7	7	0	7	0
H12	TTCGGTTTC	6	6	0	6	0
H10	TCCGTTTGA	6	6	0	6	0
H09	GGATGAAAA	6	6	0	6	0
H07	GCTAGG	6	6	0	6	0
H06	ACATAAGGT	6	6	0	6	0
H06	ACAATAGGT	6	6	0	6	0
H04	GTCGGGAAA	6	6	0	6	0
H04	GTCGGAAT	6	6	0	6	0
H03	GGCTATGA	6	6	0	6	0
H03	GGCTAATA	6	6	0	6	0
H03	GCTAAGAT	6	6	0	6	0
H01	GAAGCGATTT	6	6	0	6	0
G12	TTACCAGGG	6	6	0	6	0
G12	TACCGGG	6	6	0	6	0
G06	GATTCGCA	6	6	0	6	0
G06	GACTTCGCA	6	6	0	6	0
G06	GACCTCGCA	6	6	0	6	0
G04	CTGGAACAA	6	6	0	6	0
G03	GAACAACCG	6	6	0	6	0
G01	TCCACGACC	6	6	0	6	0
G01	TCCACACCC	6	6	0	6	0
F07	ATCGACG	6	6	0	6	0
F06	TCAGTAC	6	6	0	6	0
F04	GTACGAC	6	6	0	6	0
F01	GAAACGATT	6	6	0	6	0
E12	CCCTGTATG	6	6	0	6	0
E10	TCGTCAA	6	6	0	6	0
E10	TCCGTCA	6	6	0	6	0
E10	TCCATCAA	6	6	0	6	0
E04	CGATTACGC	6	6	0	6	0
E04	CGATACGCC	6	6	0	6	0
E04	CCGATACGC	6	6	0	6	0
E03	TTTGCATGT	6	6	0	6	0
E01	AGGAATG	6	6	0	6	0
D12	AGGATTCC	6	6	0	6	0
D12	AGGATGCCC	6	6	0	6	0
D10	CATACTCCT	6	6	0	6	0
D06	CACCTCAG	6	6991	-99.9142	6991	-99.9142
D06	ATTTGGCAA	6	6	0	6	0
D06	ATTGGTAA	6	6	0	6	0
D06	ATTACCGA	6	5237	-99.8854	5237	-99.8854
D04	AGTTGTTGTT	6	6	0	6	0
D01	TCCTAAGGA	6	6	0	6	0
C12	GTAATGC	6	6	0	6	0
C09	CTCCCGGTTT	6	6	0	6	0
C04	GGCCTCTTG	6	6	0	6	0
C01	GTGGTTC	6	6	0	6	0
C01	GTGGTCC	6	6	0	6	0
B03	ATAGAGTCT	6	6	0	6	0
A10	CGAAGCT	6	6	0	6	0
A09	GCTGAAGAT	6	6	0	6	0
A07	CAGTTCCAT	6	6	0	6	0
A04	CCTGAACC	6	776	-99.2268	776	-99.2268
A04	AGCCCTACT	6	6	0	6	0
G06	GACTCCGCA	5	5	0	5	0
A04	AGCCTACCT	5	5	0	5	0
A03	AGATAAC	5	5	0	5	0
H11	GGAAGGGACA	4	4	0	4	0
H11	GATGGACA	4	4	0	4	0
H11	GAGGGGACATT	4	4	0	4	0
H11	GAGGGAGGGACA	4	4	0	4	0
H11	GAGGGAACA	4	4	0	4	0
H11	GAGGACAT	4	4	0	4	0
H11	GAGAAGGACA	4	4	0	4	0
H11	GAAGGGACA	4	4	0	4	0
H11	AGGGGACA	4	4	0	4	0
H11	AGGACA	4	4	0	4	0
H08	ACGGGCGA	4	4	0	4	0
H08	ACGGCGATTT	4	4	0	4	0
H08	ACGGCGAATTT	4	4	0	4	0
H08	ACGGCGAAT	4	4	0	4	0
H08	ACGGCCGAT	4	4	0	4	0
H08	ACGCTGTC	4	26102	-99.9847	26102	-99.9847
H08	ACCGGCGAT	4	4	0	4	0
H08	ACAGGCGATC	4	4	0	4	0
H08	AACGGCGAT	4	4	0	4	0
H05	TGTACAGGAC	4	4	0	4	0
H05	GTACGGTTC	4	4	0	4	0
H05	GTACCAGGAT	4	4	0	4	0
H05	GTACAGGAAT	4	4	0	4	0
H05	GTACAGGAA	4	4	0	4	0
H05	GTACACGGA	4	4	0	4	0
H05	GTACACGA	4	4	0	4	0
H05	GTACAAGGAT	4	4	0	4	0
H05	GTACAAGA	4	4	0	4	0
H02	GAAAGGGTA	4	4	0	4	0
H02	AAAGGGTAG	4	4	0	4	0
H02	AAAGGGTAC	4	4	0	4	0
H02	AAAGGGTAA	4	4	0	4	0
H02	AAAGGGT	4	4	0	4	0
H02	AAAGGGGTAT	4	4	0	4	0
H02	AAAGGCGTA	4	4	0	4	0
H02	AAACGGGTA	4	4	0	4	0
G11	GATATGGGA	4	4	0	4	0
G11	ATTGGA	4	4	0	4	0
G11	ATCATGGGA	4	4	0	4	0
G11	ATATGGGGA	4	4	0	4	0
G11	ATATGGAT	4	4	0	4	0
G11	AGTATGGGA	4	4	0	4	0
G11	ACATAGGA	4	4	0	4	0
G11	AATGGGA	4	4	0	4	0
G08	GGAGATTGT	4	4	0	4	0
G08	GAGATTTGT	4	4	0	4	0
G08	GAGATGTT	4	4	0	4	0
G08	GAGATGT	4	4	0	4	0
G05	TCGCCTAGA	4	4	0	4	0
G05	TCGCCGAA	4	4	0	4	0
G05	TCGCCAGGA	4	4	0	4	0
G05	TCGCCAGATTT	4	4	0	4	0
G05	TCGCCAGATT	4	4	0	4	0
G05	TCGCCAAGA	4	4	0	4	0
G05	TCGACAGAC	4	4	0	4	0
G05	TCCGCCAGA	4	4	0	4	0
G05	TCACCAGA	4	4	0	4	0
G05	GTCGCCAGAT	4	4	0	4	0
G05	GTCGCCAGA	4	4	0	4	0
G02	GCGCCACTT	4	4	0	4	0
G02	CGCGCACTT	4	4	0	4	0
G02	CGCCCACTTT	4	4	0	4	0
G02	CGCCACTTTT	4	4	0	4	0
G02	CGCCACCT	4	4	0	4	0
F11	GCTTGA	4	4	0	4	0
F11	GCTTCAAT	4	4	0	4	0
F11	GCTTCA	4	4	0	4	0
F11	GAGCTTCAA	4	4	0	4	0
F08	GCCAAGAAG	4	4	0	4	0
F08	GCAAGAAAG	4	4	0	4	0
F08	GCAAGAAA	4	4	0	4	0
F05	TTGTAAGT	4	4	0	4	0
F05	GCTGTAAGT	4	4	0	4	0
F05	CTTGTAAG	4	4	0	4	0
F05	CTGTAGAGT	4	4	0	4	0
F05	CTGTACAGT	4	4	0	4	0
F05	CTGTAATT	4	4	0	4	0
F05	CTGTAAGTG	4	4	0	4	0
F05	CTGTAAGTA	4	4	0	4	0
F05	CTGTAAGGTT	4	4	0	4	0
F05	CTGGTAAGT	4	4	0	4	0
F05	CCTGTAAGTT	4	4	0	4	0
F05	CCTGTAAGT	4	4	0	4	0
F02	AGTCTCC	4	4	0	4	0
F02	AGGTCTCGC	4	4	0	4	0
F02	AGGTCTCCC	4	4	0	4	0
F02	AGGTCTC	4	4	0	4	0
F02	AGGGTCTCCT	4	4	0	4	0
F02	AGGGTCTCC	4	4	0	4	0
F02	AGAGTCTCC	4	4	0	4	0
F02	AGAGGTCTCC	4	4	0	4	0
E11	TTTGCCTC	4	4	0	4	0
E11	CTTTGCCTC	4	4	0	4	0
E11	CTTGGCTC	4	4	0	4	0
E11	CTAGCCTC	4	4	0	4	0
E08	TCACTCTCC	4	4	0	4	0
E08	CGCACTCTCC	4	4	0	4	0
E08	CCACTCTCC	4	4	0	4	0
E08	CACTCTTCC	4	4	0	4	0
E08	CACTCTCTCC	4	4	0	4	0
E08	CACTCTC	4	4	0	4	0
E08	CACTACTCC	4	4	0	4	0
E08	CAACTCTCC	4	4	0	4	0
E06	TTCCTCCGA	4	4	0	4	0
E05	TGTTCTCGG	4	4	0	4	0
E05	TGTTCCTCGT	4	4	0	4	0
E05	TGTTCCTCG	4	4	0	4	0
E05	TGTCTCG	4	4	0	4	0
E05	TGTACTCG	4	4	0	4	0
E05	GTGTTCTCGT	4	4	0	4	0
E05	AGTGTTCTCG	4	4	0	4	0
E02	ACCACTCAC	4	4	0	4	0
E02	ACCACCACC	4	4	0	4	0
E02	ACCACACCAC	4	4	0	4	0
E02	ACCACACAAC	4	4	0	4	0
D11	TTCAGTAGTT	4	4	0	4	0
D11	TTCAGCAG	4	4	0	4	0
D11	TCTCAGTAG	4	4	0	4	0
D11	TCAGTAG	4	4	0	4	0
D11	GTTCAGTAG	4	4	0	4	0
D11	AGTCAGTAG	4	4	0	4	0
D11	AGGACAG	4	4	0	4	0
D08	TGAAGGGATT	4	4	0	4	0
D08	TGAAGGATTTTT	4	4	0	4	0
D08	TGAAGGATTT	4	4	0	4	0
D08	TGAAGGAA	4	4	0	4	0
D08	TGAAGAT	4	4	0	4	0
D08	TGAAGA	4	4	0	4	0
D08	TAGGAT	4	4	0	4	0
D08	GTGAAGGAT	4	4	0	4	0
D05	GACGCTGTCT	4	4	0	4	0
D05	CTGGCTTCT	4	4	0	4	0
D05	CGACGCTGTC	4	4	0	4	0
D05	ACTGTC	4	4	0	4	0
D05	ACTGCTGTC	4	4	0	4	0
D05	ACGTTGTC	4	4	0	4	0
D05	ACGCTGTCG	4	4	0	4	0
D05	ACGCTGTCCT	4	4	0	4	0
D05	ACGCTATC	4	4	0	4	0
D02	CGACTTC	4	4	0	4	0
D02	CGAACTTTC	4	4	0	4	0
D02	CGAACTTCTTC	4	4	0	4	0
D02	CGAACTTCTT	4	4	0	4	0
D02	CGAACTTCC	4	4	0	4	0
D02	CGAACGTTC	4	4	0	4	0
C11	CGTTAATAG	4	4	0	4	0
C11	CGTAATAGA	4	4	0	4	0
C11	CGTAAATAG	4	4	0	4	0
C08	TTGGCTAGGT	4	4	0	4	0
C08	TTGGCTAGG	4	4	0	4	0
C08	TTGCTTAGGT	4	4	0	4	0
C08	TTGCTAGT	4	4	0	4	0
C08	TTGCTAGGG	4	4	0	4	0
C08	TTGCCGAGG	4	4	0	4	0
C05	CGAACCAGT	4	4	0	4	0
C05	CGAACATG	4	4	0	4	0
C05	CGAACAGTTTT	4	4	0	4	0
C05	CGAACAAT	4	4	0	4	0
C05	CGAACAAGT	4	4	0	4	0
C02	TATGTGGTGT	4	4	0	4	0
C02	TATGGTGTTTT	4	4	0	4	0
C02	TATGGTGTTT	4	4	0	4	0
C02	TATGGTGTGT	4	4	0	4	0
C02	TATGGGTGT	4	4	0	4	0
C02	TATGGCGT	4	4	0	4	0
C02	TAATGGTGT	4	4	0	4	0
C02	TAAGGAGTT	4	4	0	4	0
C02	GTAAGGTGT	4	4	0	4	0
B11	TGTCACCGG	4	4	0	4	0
B08	CTGAAATCA	4	4	0	4	0
B05	ATTAGCTGTT	4	4	0	4	0
B02	CGAAGTTGA	4	4	0	4	0
B02	CATGTTGATT	4	4	0	4	0
B02	CATGTTGAT	4	4	0	4	0
A08	CCCGTATAT	4	4	0	4	0
A05	ATGCCCACCT	4	4	0	4	0
A05	ATGCACCTTT	4	4	0	4	0
A05	ATGCAACCT	4	4	0	4	0
A02	TATCCAGGT	4	4	0	4	0
H12	TCTGTTTC	3	3	0	3	0
H12	TCGTTTC	3	3	0	3	0
H12	TCGTCGGTTTC	3	3	0	3	0
H12	TCGGTTTTCT	3	3	0	3	0
H12	TCGGTTTCC	3	3	0	3	0
H12	TCGCGTTTC	3	3	0	3	0
H12	TCAGGTTTC	3	3	0	3	0
H12	TCAGGTTC	3	3	0	3	0
H10	TCGTTTTGA	3	3	0	3	0
H10	TCGGTTGA	3	3	0	3	0
H09	GTCGAAA	3	3	0	3	0
H09	GTATGAAA	3	3	0	3	0
H09	GGGATGAAA	3	3	0	3	0
H09	GGATGAAATT	3	3	0	3	0
H09	GGATGAAAC	3	3	0	3	0
H09	GATGCAA	3	3	0	3	0
H09	GATGAA	3	3	0	3	0
H08	TCGGCGAT	3	3	0	3	0
H07	TGCTAGGG	3	3	0	3	0
H07	GGCTAGGGTT	3	3	0	3	0
H07	GCTTGGG	3	3	0	3	0
H07	GCTATGGT	3	3	0	3	0
H07	GCTAGGGTG	3	3	0	3	0
H07	GCTAGGCGT	3	3	0	3	0
H07	GCCTAGGGTT	3	3	0	3	0
H07	GCCTAGGGT	3	3	0	3	0
H07	GCAGGGT	3	3	0	3	0
H07	CGCTAGGGT	3	3	0	3	0
H06	ACCATAGGT	3	3	0	3	0
H06	ACATTAGGTTT	3	3	0	3	0
H06	ACATTAGGT	3	3	0	3	0
H06	ACATCGT	3	3	0	3	0
H06	ACATCGGT	3	3	0	3	0
H06	ACATAGGTA	3	3	0	3	0
H06	ACATAGGGTT	3	3	0	3	0
H06	ACATAG	3	3	0	3	0
H06	ACAGAGGA	3	3	0	3	0
H06	AACATAGG	3	3	0	3	0
H05	GTACAGGATT	3	3	0	3	0
H04	GTTCGGGAA	3	3	0	3	0
H04	GTCTGGGAA	3	3	0	3	0
H04	GTCGTGGAA	3	3	0	3	0
H04	GTCGGGGAAT	3	3	0	3	0
H04	GTCGGGAT	3	3	0	3	0
H04	GTCGGGAGA	3	3	0	3	0
H04	GTCGGGAAC	3	3	0	3	0
H04	GTCGGGAAAAA	3	3	0	3	0
H04	GTCGGCA	3	3	0	3	0
H04	GTCGGAGAA	3	3	0	3	0
H04	GTCGGAC	3	3	0	3	0
H04	GTCGAGGAA	3	3	0	3	0
H04	GGCGGGAA	3	3	0	3	0
H03	GGGCTAAGAT	3	3	0	3	0
H03	GGGCTAAGA	3	3	0	3	0
H03	GGCTAGGA	3	3	0	3	0
H03	GGCTAAGAA	3	3	0	3	0
H03	GGCCTAAGA	3	3	0	3	0
H03	GCTAACG	3	3	0	3	0
H01	TCTAGCGA	3	3	0	3	0
H01	GAGAGCGAT	3	3	0	3	0
H01	GAAAGCGAT	3	3	0	3	0
H01	GAAAGCGA	3	3	0	3	0
H01	CGAAGCGATT	3	3	0	3	0
G12	TTTCCGGG	3	3	0	3	0
G12	TTTACCGG	3	3	0	3	0
G12	TTACCTGG	3	3	0	3	0
G12	TTACCGGGGT	3	3	0	3	0
G12	TTACCGAGGT	3	3	0	3	0
G12	TTACCCGGGT	3	3	0	3	0
G12	TTACCCGG	3	3	0	3	0
G12	TTAACCGGG	3	3	0	3	0
G12	TGTACCGGG	3	3	0	3	0
G12	CTTACCGGG	3	3	0	3	0
G11	ACGCTGGGC	3	3	0	3	0
G10	GAACACATC	3	3	0	3	0
G10	AACCACATC	3	3	0	3	0
G10	AACACCATCT	3	3	0	3	0
G10	AACACATCC	3	3	0	3	0
G10	AACACAATC	3	3	0	3	0
G10	AAACACATCT	3	3	0	3	0
G09	CGAACTGAGC	3	3	0	3	0
G09	AACCTGAGC	3	3	0	3	0
G07	TACATCTGTTT	3	3	0	3	0
G07	TACATATG	3	3	0	3	0
G07	TACAATCTGT	3	3	0	3	0
G06	GACTCTTCGCA	3	3	0	3	0
G06	GACTCTCGCA	3	3	0	3	0
G06	GACTCGGCAA	3	3	0	3	0
G06	GACTCGCTT	3	3	0	3	0
G06	GACTCGCCA	3	3	0	3	0
G06	GACTCGCAA	3	3	0	3	0
G06	GACTCCGCAT	3	3	0	3	0
G06	CGGACTCGCA	3	3	0	3	0
G06	ACTCGCAT	3	3	0	3	0
G05	TTCGCCAGA	3	3	0	3	0
G04	TGGACAA	3	3	0	3	0
G04	CTGGGACAA	3	3	0	3	0
G04	CTGGACCA	3	3	0	3	0
G04	CTGGACAAA	3	3	0	3	0
G04	CTGGACA	3	3	0	3	0
G04	CTGACAA	3	3	0	3	0
G04	CTGAACAA	3	3	0	3	0
G04	CCTGGACAA	3	3	0	3	0
G04	CAGGACAAT	3	3	0	3	0
G03	GGAACACCGT	3	3	0	3	0
G03	GGAACACCG	3	3	0	3	0
G03	GCAACACCG	3	3	0	3	0
G03	GAACATACCG	3	3	0	3	0
G03	GAACACCGTT	3	3	0	3	0
G03	GAACACCCGT	3	3	0	3	0
G03	GAACACCCG	3	3	0	3	0
G03	GAACACAG	3	3	0	3	0
G03	GAACACACCGT	3	3	0	3	0
G03	GAACACACCG	3	3	0	3	0
G03	GAACAACCGTT	3	3	0	3	0
G03	GAAACACCGTT	3	3	0	3	0
G03	CGAACACCGT	3	3	0	3	0
G03	AACACCGT	3	3	0	3	0
G03	AACACACCG	3	3	0	3	0
G01	TCCCACACCC	3	3	0	3	0
G01	TCACACC	3	3	0	3	0
F12	GAATTCTCC	3	3	0	3	0
F12	GAATTCCTC	3	3	0	3	0
F12	AGAATTCTC	3	3	0	3	0
F12	AATTCTCT	3	3	0	3	0
F10	GCCAGTCAC	3	3	0	3	0
F10	CGCAGTCACT	3	3	0	3	0
F10	CCATTCAC	3	3	0	3	0
F10	CCAGTTAC	3	3	0	3	0
F10	CCAGTCCAC	3	3	0	3	0
F10	CCAGGTCAC	3	3	0	3	0
F09	GACGTAGCC	3	3	0	3	0
F09	ACTTAGCC	3	3	0	3	0
F09	ACGTAGGCC	3	3	0	3	0
F09	ACGTAGCT	3	3	0	3	0
F09	ACGTAGCCC	3	3	0	3	0
F07	ATCCCGACG	3	3	0	3	0
F07	AGATCCGACG	3	3	0	3	0
F07	AATCCGACGT	3	3	0	3	0
F07	AATCCGACG	3	3	0	3	0
F06	TTCAGGTAC	3	3	0	3	0
F06	TGCAGGTAC	3	3	0	3	0
F06	TCAGGTTAC	3	3	0	3	0
F06	TCAGGGTAC	3	3	0	3	0
F06	GGTGTCT	3	101	-97.0297	101	-97.0297
F06	CAGGTAC	3	3	0	3	0
F05	CTGTAGA	3	3	0	3	0
F04	TGTACGACAC	3	3	0	3	0
F04	TGTACGAAC	3	3	0	3	0
F04	TGACGAC	3	3	0	3	0
F04	TGAACGACCT	3	3	0	3	0
F04	GTGTACGAC	3	3	0	3	0
F03	GTGTCT	3	3	0	3	0
F03	GGTTGTCTTT	3	3	0	3	0
F03	GGTGTCTTTT	3	3	0	3	0
F03	GGTGTCCTT	3	3	0	3	0
F03	GGTGTCCT	3	3	0	3	0
F03	GGGTGTCTTT	3	3	0	3	0
F03	GGGGTGTCTT	3	3	0	3	0
F01	GTACGATT	3	3	0	3	0
F01	GGAACGATTT	3	3	0	3	0
F01	AACGAT	3	3	0	3	0
E12	CCTTATG	3	3	0	3	0
E12	CCTGTCATG	3	3	0	3	0
E12	CCTGTATT	3	3	0	3	0
E12	CCTGTAG	3	3	0	3	0
E12	CCTGGTATG	3	3	0	3	0
E11	CTTGGCCTC	3	3	0	3	0
E10	TTCCGTCAA	3	3	0	3	0
E10	TCCTGTCAA	3	3	0	3	0
E10	TCCGGTCAA	3	3	0	3	0
E10	GTCCGTCAA	3	3	0	3	0
E10	CTCCGTCAA	3	3	0	3	0
E09	GGCTTCTG	3	3	0	3	0
E09	CGCTTTCTGT	3	3	0	3	0
E09	CGCTTCTGTT	3	3	0	3	0
E09	CGCTTCTGGT	3	3	0	3	0
E09	CGCTTCT	3	3	0	3	0
E09	CGCTTCCG	3	3	0	3	0
E09	CGCTTCAG	3	3	0	3	0
E09	CGCGCTTCTG	3	3	0	3	0
E07	TCTGCTATC	3	3	0	3	0
E07	TCTACGATC	3	3	0	3	0
E07	TCCTCTATC	3	3	0	3	0
E07	GTCTCTATC	3	3	0	3	0
E06	TTTCTCCG	3	3	0	3	0
E06	TTTCCTCCG	3	3	0	3	0
E06	TTCTCCCTCCG	3	3	0	3	0
E06	TTCCTTTCCG	3	3	0	3	0
E06	TTCCTTCGT	3	3	0	3	0
E06	TTCCTCTCCG	3	3	0	3	0
E06	TTCCTCCCGT	3	3	0	3	0
E06	TTCCCCTCCG	3	3	0	3	0
E06	CTCCTCCG	3	3	0	3	0
E06	ATTCCTCCCG	3	3	0	3	0
E04	GCGATACGC	3	3	0	3	0
E04	CTCGATACGC	3	3	0	3	0
E04	CGGATACGC	3	3	0	3	0
E04	CGATACGCTT	3	3	0	3	0
E04	CGATACCGC	3	3	0	3	0
E04	CGATACACGCT	3	3	0	3	0
E04	CGATACACGC	3	3	0	3	0
E03	TTGCATGTTT	3	3	0	3	0
E03	TTGCATGGTT	3	3	0	3	0
E03	TTGCAATGTT	3	3	0	3	0
E03	TTGCAATGT	3	3	0	3	0
E02	TCACCAA	3	3	0	3	0
E01	AGGAATTGGT	3	3	0	3	0
E01	AGGAATGGGT	3	3	0	3	0
E01	AGAATGGT	3	3	0	3	0
D12	AGGGATGCC	3	3	0	3	0
D12	AGGATTGCC	3	3	0	3	0
D12	AGGAGGATGCC	3	3	0	3	0
D12	AGGAGCC	3	3	0	3	0
D12	AGAGATGCC	3	3	0	3	0
D10	GCATACTCT	3	3	0	3	0
D10	CTTACTCT	3	3	0	3	0
D10	CATACCTCT	3	3	0	3	0
D10	CATACAC	3	3	0	3	0
D10	CATAACTCT	3	3	0	3	0
D10	ATACTCT	3	3	0	3	0
D09	AGTCCGAAT	3	3	0	3	0
D07	CTGTAGATT	3	3	0	3	0
D07	CTAGGGATT	3	3	0	3	0
D07	CTAGGATTTTT	3	3	0	3	0
D07	CTAGGAATT	3	3	0	3	0
D06	GATTGGCAA	3	3	0	3	0
D06	ATTGTGCAAT	3	3	0	3	0
D06	ATTGGCCAAT	3	3	0	3	0
D06	ATTGGCATG	3	3	0	3	0
D06	ATTGGACAA	3	3	0	3	0
D06	ATTGCAAT	3	3	0	3	0
D06	ATTGACAAT	3	3	0	3	0
D06	ATTGACAA	3	3	0	3	0
D06	ATAGGCAA	3	3	0	3	0
D06	AGATTGGCAA	3	3	0	3	0
D06	AATTGGCAA	3	3	0	3	0
D06	AATGGCAA	3	3	0	3	0
D04	AGTTTGTTG	3	3	0	3	0
D04	AGTTGTGT	3	3	0	3	0
D04	AGTGTTG	3	3	0	3	0
D03	GATTACCGA	3	3	0	3	0
D03	ATTACCGATTTT	3	3	0	3	0
D03	ATTACCCGAT	3	3	0	3	0
D03	ATTACCCGA	3	3	0	3	0
D03	ATATACCGA	3	3	0	3	0
D03	ATACCGA	3	3	0	3	0
D01	TTCTAAGGA	3	3	0	3	0
D01	TCTTAAGGA	3	3	0	3	0
D01	TCTAAGGTA	3	3	0	3	0
D01	TCTAAGGGAT	3	3	0	3	0
D01	TCCTAAGGATT	3	3	0	3	0
D01	TCCTAAGGAT	3	3	0	3	0
D01	TCAAGGA	3	3	0	3	0
D01	GTCTAAGGAT	3	3	0	3	0
D01	CGTCTAAGGA	3	3	0	3	0
D01	ACTAAGGA	3	3	0	3	0
C12	GTTTAATGCT	3	3	0	3	0
C12	GTTATGGCA	3	3	0	3	0
C12	GTTAATGCTT	3	3	0	3	0
C12	GTTAATGCG	3	3	0	3	0
C12	GGTTAATGC	3	3	0	3	0
C10	TCAACCTCAG	3	3	0	3	0
C10	GCTCCTCAG	3	3	0	3	0
C10	CCACCTCAG	3	3	0	3	0
C10	CACTCAG	3	3	0	3	0
C10	CACCTCAGG	3	3	0	3	0
C10	CAACCTCAG	3	3	0	3	0
C09	CTCCGTT	3	3	0	3	0
C09	CTCCGT	3	3	0	3	0
C09	CTCCGGTTTTTT	3	3	0	3	0
C09	CTCCGGTTTTT	3	3	0	3	0
C09	CTCCGGTG	3	3	0	3	0
C09	CTCCCGGTT	3	3	0	3	0
C09	CCTCCGGTT	3	3	0	3	0
C07	AGGACTGCCTG	3	3	0	3	0
C07	AGGACGCTG	3	3	0	3	0
C07	AGACGGCTG	3	3	0	3	0
C07	AGACGCCG	3	3	0	3	0
C07	AGACCGCTG	3	3	0	3	0
C06	GTTTAGCA	3	3	0	3	0
C06	GTGTTAGCA	3	3	0	3	0
C06	GGTTTAGCAT	3	3	0	3	0
C06	GGTTATGCA	3	3	0	3	0
C06	GGTTAGCAAT	3	3	0	3	0
C06	GGTTAGCAA	3	3	0	3	0
C06	GGTTAGC	3	3	0	3	0
C05	GCGAACAGTT	3	3	0	3	0
C04	GGGCTCTTGT	3	3	0	3	0
C04	GGCTCTTTG	3	3	0	3	0
C04	GGCTCTGG	3	3	0	3	0
C04	GGCTCTG	3	3	0	3	0
C04	GCTCTG	3	3	0	3	0
C03	GCGGGCTTCT	3	3	0	3	0
C03	CTTGGCTCT	3	3	0	3	0
C03	CTGGGCTCT	3	3	0	3	0
C03	CTGGCCTCT	3	3	0	3	0
C03	CTGCTCTT	3	3	0	3	0
C03	CGTGGCTCT	3	3	0	3	0
C02	TATGTGTG	3	3	0	3	0
C01	GTGGTTTCCT	3	3	0	3	0
C01	GTGGTTCTC	3	3	0	3	0
C01	GTGGTTCCG	3	3	0	3	0
C01	GTGGTTCCC	3	3	0	3	0
C01	GGTGGTTCC	3	3	0	3	0
C01	GAGGTTCC	3	3	0	3	0
C01	GAGGGTTCC	3	3	0	3	0
C01	CGATACGC	3	7549	-99.9603	7549	-99.9603
B12	ACCCTTGAA	3	3	0	3	0
B09	AGGACGTT	3	3	0	3	0
B09	AGGACGGTTT	3	3	0	3	0
B07	GCATCACCG	3	3	0	3	0
B07	CATCACG	3	3	0	3	0
B06	TCACGCTCT	3	3	0	3	0
B06	TCACGCTCC	3	3	0	3	0
B01	ATACTGCAG	3	3	0	3	0
A10	CGCAGCT	3	3	0	3	0
A09	CTGAAGA	3	3	0	3	0
A07	CAGTTCA	3	3	0	3	0
A04	CAGTTCCA	3	651	-99.5392	651	-99.5392
A04	AGGCCTACT	3	3	0	3	0
A03	GAGGATAAC	3	3	0	3	0
A03	GAGATAACT	3	3	0	3	0
A01	CCTGAAC	3	3	0	3	0
H12	TCGTGTTTC	2	2	0	2	0
G10	AAACACATC	2	2	0	2	0
G03	GAACAACCGT	2	2	0	2	0
E04	CGATATACGC	2	2	0	2	0
D04	AGTTTGTTGT	2	2	0	2	0
D01	TCTAAGGATT	2	2	0	2	0
C12	GTTATATGC	2	2	0	2	0
C06	GGGGTTAGCA	2	2	0	2	0
A01	CCCTGAACC	2	2	0	2	0

## Sheet: Dataset4
Reference	Barcode	Barcode Count - REF	Barcode Count-SLOPE	% Diff - REF:SLOPE	Barcode Counts-DISTANCE	% Diff Ref:DISTANCE
H05	GTACAGGA	53067	53067	0	53067	0			% Diff - REF:SLOPE - AVG	-0.937216
G05	TCGCCAGA	29587	29587	0	29587	0			% Diff - REF:SLOPE - SD	9.61695
D05	ACGCTGTC	28622	28472	0.526833	28472	0.526833
H04	GTCGGGAA	26614	26614	0	26614	0			% Diff Ref:DISTANCE - AVG	-0.937216
F05	CTGTAAGT	24889	24889	0	24889	0			% Diff Ref:DISTANCE - SD	9.61695
H11	GAGGGACA	21445	21445	0	21445	0
D06	ATTGGCAA	20848	20808	0.192234	20808	0.192234
H06	ACATAGGT	20812	20796	0.0769379	20796	0.0769379
H02	AAAGGGTA	19749	19746	0.015193	19746	0.015193
C05	CGAACAGT	16891	16891	0	16891	0
G11	ATATGGGA	15911	15911	0	15911	0
F04	TGTACGAC	13961	13961	0	13961	0
E05	TGTTCTCG	12792	12787	0.0391022	12787	0.0391022
H08	ACGGCGAT	11956	11956	0	11956	0
G06	GACTCGCA	11696	11692	0.0342114	11692	0.0342114
D08	TGAAGGAT	11516	11516	0	11516	0
D02	CGAACTTC	10423	10423	0	10423	0
C02	TATGGTGT	10265	10268	-0.029217	10268	-0.029217
H01	GAAGCGAT	10216	10216	0	10216	0
E02	ACCACCAC	9857	9857	0	9857	0
C06	GGTTAGCA	9554	9554	0	9554	0
E06	TTCCTCCG	9514	9494	0.210659	9494	0.210659
H03	GGCTAAGA	9466	9466	0	9466	0
C11	CGTAATAG	9394	9394	0	9394	0
F02	AGGTCTCC	9202	9202	0	9202	0
F06	TCAGGTAC	9174	9154	0.218484	9154	0.218484
D11	TTCAGTAG	8937	8937	0	8937	0
H12	TCGGTTTC	8870	8870	0	8870	0
D01	TCTAAGGA	8678	8678	0	8678	0
G08	GAGATTGT	8262	8262	0	8262	0
C04	GGCTCTTG	7900	7900	0	7900	0
H10	TCGTTTGA	7818	7818	0	7818	0
E12	CCTGTATG	7808	7808	0	7808	0
E01	AGGAATGG	7626	7626	0	7626	0
C08	TTGCTAGG	7540	7540	0	7540	0
H07	GCTAGGGT	7466	7466	0	7466	0
G02	CGCCACTT	7280	7280	0	7280	0
D12	AGGATGCC	7228	7228	0	7228	0
G04	CTGGACAA	7154	7154	0	7154	0
E04	CGATACGC	7046	7042	0.056802	7042	0.056802
G12	TTACCGGG	6710	6710	0	6710	0
C10	CACCTCAG	6294	6294	0	6294	0
H09	GGATGAAA	6195	6195	0	6195	0
E11	CTTGCCTC	6022	6022	0	6022	0
C12	GTTAATGC	6018	6018	0	6018	0
E03	TTGCATGT	5932	5932	0	5932	0
C01	GTGGTTCC	5648	5648	0	5648	0
E10	TCCGTCAA	5604	5604	0	5604	0
C03	CTGGCTCT	5376	5376	0	5376	0
G01	TCCACACC	5324	5324	0	5324	0
D10	CATACTCT	5289	5289	0	5289	0
G10	AACACATC	5233	5239	-0.114526	5239	-0.114526
F11	GGCTTCAA	5193	5193	0	5193	0
D03	ATTACCGA	5036	5028	0.159109	5028	0.159109
F08	GCAAGAAG	5034	5034	0	5034	0
E08	CACTCTCC	4890	4890	0	4890	0
F01	GAACGATT	4887	4887	0	4887	0
G03	GAACACCG	4614	4614	0	4614	0
D04	AGTTGTTG	4414	4414	0	4414	0
E09	CGCTTCTG	4308	4308	0	4308	0
C09	CTCCGGTT	4202	4202	0	4202	0
F10	CCAGTCAC	4118	4118	0	4118	0
D07	CTAGGATT	4042	4042	0	4042	0
F12	GAATTCTC	3754	3754	0	3754	0
C07	AGACGCTG	3532	3532	0	3532	0
A05	ATGCACCT	3531	3531	0	3531	0
F03	GGTGTCTT	2995	2995	0	2995	0
G07	TACATCTG	2880	2880	0	2880	0
E07	TCTCTATC	2796	2796	0	2796	0
G09	AACTGAGC	2734	2734	0	2734	0
F09	ACGTAGCC	1717	1717	0	1717	0
F07	ATCCGACG	1670	1670	0	1670	0
A02	TATCCAGT	1507	1507	0	1507	0
A04	AGCCTACT	1234	1234	0	1234	0
A11	TATCTGTG	977	977	0	977	0
A06	CATGGAAT	840	840	0	840	0
A08	CCGTATAT	762	762	0	762	0
B05	ATTAGCTG	741	741	0	741	0
C05	CGAACAGTT	711	711	0	711	0
A01	CCTGAACC	670	670	0	670	0
B11	TGTCACCG	647	647	0	647	0
A10	CGCAAGCT	640	640	0	640	0
B04	TAACCTCA	626	626	0	626	0
H05	GTACAGGAT	616	616	0	616	0
H06	ACATAGGTT	586	586	0	586	0
A09	GCTGAAGA	562	562	0	562	0
A03	GAGATAAC	556	556	0	556	0
B02	CATGTTGA	543	543	0	543	0
B08	CTGAATCA	540	540	0	540	0
A07	CAGTTCCA	536	536	0	536	0
F05	CTGTAAGTT	531	531	0	531	0
C02	TATGGTGTT	507	507	0	507	0
A12	GCCGAATG	448	448	0	448	0
B12	ACCTTGAA	438	438	0	438	0
B06	TCACGCTC	438	438	0	438	0
B01	TACTGCAG	432	432	0	432	0
B10	GAACGTAG	390	390	0	390	0
B03	ATAGAGTC	376	376	0	376	0
G05	TCGCCAGAT	345	345	0	345	0
F05	CTGTAAG	330	330	0	330	0
H07	GCTAGGGTT	320	320	0	320	0
D08	TGAAGGATT	300	300	0	300	0
E05	TGTTCTCGT	282	282	0	282	0
H11	GAGGGACAT	273	273	0	273	0
C11	CGTAATAGT	273	273	0	273	0
H02	AAAGGGTAT	262	262	0	262	0
H08	ACGGCGATT	261	261	0	261	0
H01	GAAGCGATT	260	260	0	260	0
H04	GTCGGGAAT	254	254	0	254	0
C09	CTCCGGTTT	254	254	0	254	0
D05	ACGCTGTCT	249	249	0	249	0
E06	TTCCTCCGT	240	240	0	240	0
G02	CGCCACT	233	233	0	233	0
B09	AGGACGGT	226	226	0	226	0
G11	ATATGGGAT	221	221	0	221	0
G08	GAGATTGTT	219	219	0	219	0
D06	ATTGGCAAT	218	218	0	218	0
H08	ACGGCGA	213	213	0	213	0
D08	TGAAGGA	213	213	0	213	0
H06	ACATAGG	210	210	0	210	0
E01	AGGAATGGT	210	210	0	210	0
D11	TTCAGTAGT	210	210	0	210	0
H04	GTCGGAA	194	194	0	194	0
F04	TGTACGACT	192	192	0	192	0
C05	CGAACAG	192	192	0	192	0
G12	TTACCGGGT	184	184	0	184	0
G03	GAACACCGT	182	182	0	182	0
E03	TTGCATGTT	182	182	0	182	0
B07	GCATCACG	166	166	0	166	0
H01	GAAGCGA	162	162	0	162	0
C08	TTGCTAGGT	162	162	0	162	0
G11	ATATGGA	156	156	0	156	0
E12	CCTGTATGT	150	150	0	150	0
C06	GGTTAGCAT	146	146	0	146	0
D07	CTAGGATTT	144	144	0	144	0
H09	GATGAAA	140	140	0	140	0
F01	GAACGATTT	138	138	0	138	0
D04	AGTTGTTGT	134	134	0	134	0
F01	GAACGAT	130	130	0	130	0
D09	AGTCCGAA	130	130	0	130	0
C06	GTTAGCA	126	126	0	126	0
C04	GGCTCTTGT	122	122	0	122	0
H07	GCTAGGG	116	116	0	116	0
F06	TCAGGTACT	116	116	0	116	0
H11	GAGGACA	114	114	0	114	0
H05	TACAGGA	114	114	0	114	0
G06	GACTCGCAT	114	114	0	114	0
D10	CATACTC	114	114	0	114	0
G02	CGCCACTTT	113	113	0	113	0
D01	TCTAAGGAT	112	112	0	112	0
C10	CACCTCAGT	110	110	0	110	0
C04	GCTCTTG	110	110	0	110	0
E02	ACCACCACT	107	107	0	107	0
H03	GCTAAGA	104	104	0	104	0
C03	CTGGCTC	100	100	0	100	0
G08	GAGATTG	96	96	0	96	0
C02	TATGGTG	93	93	0	93	0
E04	CGATACGCT	92	92	0	92	0
F03	GGTGTCT	90	90	0	90	0
G04	CTGGACAAT	88	88	0	88	0
C03	CTGGCTCTT	88	88	0	88	0
H11	GAGGGGACA	87	87	0	87	0
H10	TCGTTTGAT	82	82	0	82	0
D12	AGGATGCCT	82	82	0	82	0
H11	AGGGACA	81	81	0	81	0
A05	ATGCACCTT	81	81	0	81	0
D07	CTAGGAT	80	80	0	80	0
C09	CTCCGGT	80	80	0	80	0
G07	TACATCTGT	78	78	0	78	0
C07	AGACGCTGT	78	78	0	78	0
C12	GTTAATGCT	76	76	0	76	0
F08	GCAAGAAGT	75	75	0	75	0
H03	GGCTAAGAT	74	74	0	74	0
H12	TCGGTTTCT	72	72	0	72	0
E03	TTGCATG	70	70	0	70	0
D02	CGAACTTCT	69	69	0	69	0
H09	GGATGAAAT	68	68	0	68	0
D10	CATACTCTT	68	68	0	68	0
E09	CGCTTCTGT	66	66	0	66	0
A05	ATGCACC	66	66	0	66	0
H04	TCGGGAA	64	64	0	64	0
E10	TCCGTCAAT	64	64	0	64	0
F11	GCTTCAA	63	63	0	63	0
H01	AAGCGAT	62	62	0	62	0
F07	ATCCGACGT	60	60	0	60	0
H04	GTCGGGGAA	58	58	0	58	0
F02	AGGTCTCCT	51	51	0	51	0
E11	CTTGCCTCT	51	51	0	51	0
G12	TTACCGG	50	50	0	50	0
G01	TCCACACCT	50	52	-3.84615	52	-3.84615
F03	GGTGTCTTT	50	50	0	50	0
H05	GTACAGA	48	48	0	48	0
A02	TATCCAGTT	48	48	0	48	0
G12	TTACCCGGG	46	46	0	46	0
D06	ATTGCAA	46	46	0	46	0
D03	ATTACCGAT	46	46	0	46	0
H02	AAAGGTA	45	45	0	45	0
F11	GGCTTCAAT	45	45	0	45	0
G06	ACTCGCA	44	44	0	44	0
C01	GTGGTTCCT	44	44	0	44	0
F10	CCAGTCACT	42	42	0	42	0
F01	AACGATT	40	40	0	40	0
H05	GGTACAGGA	39	39	0	39	0
G10	AACACATCT	38	38	0	38	0
H02	AAGGGTA	36	36	0	36	0
H02	AAAGGGGTA	35	35	0	35	0
D06	ATGGCAA	34	34	0	34	0
H05	GTACAAGGA	33	33	0	33	0
G05	TCGCCCAGA	33	33	0	33	0
E08	CACTCTCCT	33	33	0	33	0
A02	TATCCAG	33	33	0	33	0
H07	GCTAGGT	32	32	0	32	0
B09	AGGACGGTT	32	32	0	32	0
G05	TCGCAGA	30	30	0	30	0
H06	ACATAGT	28	28	0	28	0
H05	GTACAGGGA	27	27	0	27	0
H10	TCGTTGA	26	26	0	26	0
G03	AACACCG	26	26	0	26	0
F12	GAATTCTCT	26	26	0	26	0
F12	AATTCTC	26	26	0	26	0
H12	TCGGTTC	24	24	0	24	0
H08	ACGGGCGAT	24	24	0	24	0
G09	AACTGAGCT	24	24	0	24	0
F09	ACGTAGCCT	24	24	0	24	0
E07	TCTCTATCT	24	24	0	24	0
E06	TTCCCTCCG	24	24	0	24	0
D05	ACGGTGTC	24	24	0	24	0
D05	ACGCTGTCC	24	24	0	24	0
C12	TTAATGC	24	24	0	24	0
A04	AGCCTAC	24	24	0	24	0
A11	TATCTGTGT	23	23	0	23	0
H04	GTCGGGA	22	22	0	22	0
E04	CGATAACGC	22	22	0	22	0
A04	AGCCTACTT	22	22	0	22	0
G08	AGATTGT	21	21	0	21	0
C02	TATGGTGTTT	21	21	0	21	0
B11	TGTCACCGT	21	21	0	21	0
B05	ATTAGCTGT	21	21	0	21	0
G01	TCCCACACC	20	20	0	20	0
E06	TTCCTCCCG	20	20	0	20	0
A06	CATGGAATT	20	20	0	20	0
H06	ACATAGGGT	18	18	0	18	0
F03	GTGTCTT	18	18	0	18	0
E08	CACTCCTCC	18	18	0	18	0
E02	ACCACCCAC	18	18	0	18	0
D05	ACGCTTGTC	18	18	0	18	0
E01	AGAATGG	16	16	0	16	0
A12	GCCGAATGT	16	16	0	16	0
A10	CGCAAGCTT	16	16	0	16	0
A10	CGCAAGC	16	16	0	16	0
G05	TCGCCGGA	15	15	0	15	0
E02	ACCCACCAC	15	15	0	15	0
D02	CGAACTTTC	15	15	0	15	0
C08	TTGCTAG	15	15	0	15	0
E06	TTTCCTCCG	14	14	0	14	0
D06	ATTGGGCAA	14	14	0	14	0
C09	CTCCGGTTTT	14	14	0	14	0
C06	GGGTTAGCA	14	14	0	14	0
C04	GGGCTCTTG	14	14	0	14	0
B07	GCATCACGT	14	14	0	14	0
A06	CATGGAA	14	14	0	14	0
H05	GTAACAGGAT	13	13	0	13	0
H12	TCGTTTC	12	12	0	12	0
H11	GGAGGGACA	12	12	0	12	0
H09	GGATGAAAA	12	12	0	12	0
H09	GGATGAA	12	12	0	12	0
H07	GCTAGGGTTT	12	12	0	12	0
H07	GCTAGGGGT	12	12	0	12	0
H07	CTAGGGT	12	12	0	12	0
H06	ACATATGT	12	12	0	12	0
H04	GTCGGGAAA	12	12	0	12	0
H04	GTCCGGGAA	12	12	0	12	0
H03	GGGCTAAGA	12	12	0	12	0
H01	AAGCGA	12	12	0	12	0
G06	GACTCCGCA	12	12	0	12	0
G03	GAAACACCG	12	12	0	12	0
F11	GGCTTCA	12	12	0	12	0
F08	CAAGAAG	12	12	0	12	0
F06	TCAGATAC	12	12	0	12	0
F05	CTGTAAGTTT	12	12	0	12	0
F02	AGGTCCTCC	12	12	0	12	0
E06	TTCCTCG	12	12	0	12	0
E05	TGTTCTCGTT	12	12	0	12	0
D08	TGAAGTAT	12	12	0	12	0
C07	AGGACGCTG	12	12	0	12	0
C05	CGAACAGTTT	12	12	0	12	0
A08	CCGTATATT	12	12	0	12	0
H05	GTTACAGGA	11	11	0	11	0
G08	GAGATTGTTT	11	11	0	11	0
D05	GACGCTGTC	11	11	0	11	0
H12	TCGGTTTTC	10	10	0	10	0
H01	GGAAGCGAT	10	10	0	10	0
G06	GGACTCGCA	10	10	0	10	0
G04	CTGGGACAA	10	10	0	10	0
E06	TTCCTTCCG	10	10	0	10	0
E06	TCCTCCG	10	10	0	10	0
D12	AGATGCC	10	10	0	10	0
D06	ATTGGCA	10	10	0	10	0
C01	GTGGTTTCC	10	10	0	10	0
A07	CAGTTCCAT	10	10	0	10	0
H11	GAGGGACAA	9	9	0	9	0
H11	GAAGGGACA	9	9	0	9	0
H11	AGGACA	9	9	0	9	0
H05	GTACAGGATT	9	9	0	9	0
G05	TCGCCAGATT	9	9	0	9	0
G05	TCCGCCAGA	9	9	0	9	0
F05	CTTGTAAGT	9	9	0	9	0
F02	AGGTCTCCC	9	9	0	9	0
E11	CTTGCCCTC	9	9	0	9	0
E05	TGTTTCTCG	9	9	0	9	0
D05	ACGCTGTCTT	9	9	0	9	0
C11	GCGTAATAG	9	9	0	9	0
C11	CGTATAG	9	9	0	9	0
C05	CGAAACAGT	9	9	0	9	0
A08	CCGTATA	9	9	0	9	0
H12	TCGGGTTTC	8	8	0	8	0
H10	TCGTTTTGA	8	8	0	8	0
H09	GGGATGAAA	8	8	0	8	0
H06	ACATAGGTTT	8	8	0	8	0
H04	TTCGGGAA	8	8	0	8	0
H04	GTCGGAAT	8	8	0	8	0
H01	GAAGCGATTT	8	8	0	8	0
G12	TTACCGGGG	8	8	0	8	0
G12	TACCGGG	8	8	0	8	0
G11	ATATGGGGA	8	8	0	8	0
G04	CTGGACA	8	8	0	8	0
G03	GAACAACCG	8	8	0	8	0
G01	TCCACGACC	8	8	0	8	0
F10	CAGTCAC	8	8	0	8	0
F03	GTGTCT	8	8	0	8	0
F01	GAAACGATT	8	8	0	8	0
F01	AACGAT	8	8	0	8	0
E06	TTCTCCG	8	8	0	8	0
E01	AGGAATG	8	8	0	8	0
D12	AGGATGC	8	8	0	8	0
C12	GTAATGC	8	8	0	8	0
C12	GGTTAATGC	8	8	0	8	0
C09	CTCCGTT	8	8	0	8	0
C01	TGGTTCC	8	8	0	8	0
C01	GTGGGTTCC	8	8	0	8	0
C01	GGTGGTTCC	8	8	0	8	0
B09	AGGACGG	8	8	0	8	0
A01	CCTGAACCT	8	8	0	8	0
H12	TCTGTTTC	6	6	0	6	0
H12	TCCGGTTTC	6	6	0	6	0
H11	GAGGGACATT	6	6	0	6	0
H11	AGGGACAT	6	6	0	6	0
H09	GATGAAAT	6	6	0	6	0
H08	ACGGCGGAT	6	6	0	6	0
H08	ACGGCGATTT	6	6	0	6	0
H06	GACATAGGT	6	6	0	6	0
H05	GTACCAGGA	6	6	0	6	0
H05	GTACATGA	6	6	0	6	0
H05	GTACAGGGAT	6	6	0	6	0
H05	GTACAGAT	6	6	0	6	0
H05	GTACACGGA	6	6	0	6	0
H05	GTACACGA	6	6	0	6	0
H05	GTACAAGGAT	6	6	0	6	0
H05	GTACAAGA	6	6	0	6	0
H05	GTAACAGGA	6	6	0	6	0
H04	TCGGGAAT	6	6	0	6	0
H04	GTCTGGAA	6	6	0	6	0
H03	GCTAAGAT	6	6	0	6	0
H02	AAAGGGTTA	6	6	0	6	0
H02	AAAGGGTAA	6	6	0	6	0
H02	AAAGGGGTAT	6	6	0	6	0
G12	TTTACCGGG	6	6	0	6	0
G12	TTACCGGGTT	6	6	0	6	0
G11	ATATGGGGAT	6	6	0	6	0
G10	AAACACATC	6	6	0	6	0
G08	GGAGATTGT	6	6	0	6	0
G06	GACTCGCCA	6	6	0	6	0
G06	GACTCGCATT	6	6	0	6	0
G03	GAACACCGTT	6	6	0	6	0
G03	GAACACCCG	6	6	0	6	0
G01	TCCACAACC	6	6	0	6	0
F08	GGCAAGAAG	6	6	0	6	0
F08	GCAAGAG	6	6	0	6	0
F08	ACAAGAAG	6	6	0	6	0
F05	CTGTACAGT	6	6	0	6	0
F05	CTGTAATT	6	6	0	6	0
F05	CTGTAAGGT	6	6	0	6	0
F03	GGTGTCCTT	6	6	0	6	0
E12	CCCTGTATG	6	6	0	6	0
E08	CACTCTCCC	6	6	0	6	0
E08	CACTCGTCC	6	6	0	6	0
E05	TGTCTCG	6	6	0	6	0
E05	TGGTCTCG	6	6	0	6	0
E03	TTGCAATGT	6	6	0	6	0
E02	ACCACCACC	6	6	0	6	0
E02	ACCACCACAC	6	6	0	6	0
E01	AGGAATGGG	6	6	0	6	0
E01	AGGAAATGG	6	6	0	6	0
D12	AGGGATGCC	6	6	0	6	0
D12	AAGATGCC	6	6	0	6	0
D11	TTTCAGTAG	6	6	0	6	0
D11	TTCAGTAGG	6	6	0	6	0
D10	CTTACTCT	6	6	0	6	0
D08	TGAAGGATTT	6	6	0	6	0
D08	TGAAGAT	6	6	0	6	0
D06	ATTGGCAAA	6	6	0	6	0
D05	ACTGTC	6	6	0	6	0
D05	ACGCTATC	6	6	0	6	0
D05	ACCGCTGTC	6	6	0	6	0
D02	CGACTTC	6	6	0	6	0
D02	CGAACCTTC	6	6	0	6	0
D02	CGAAACTTC	6	6	0	6	0
D01	TCCTAAGGA	6	6	0	6	0
C09	CTCGGTT	6	6	0	6	0
C06	GGTAGCA	6	6	0	6	0
C05	CTAACAGT	6	6	0	6	0
C05	CGAACAAGTT	6	6	0	6	0
C05	CCGAACAGT	6	6	0	6	0
C04	GGCTCTG	6	6	0	6	0
C04	GGCCTCTTG	6	6	0	6	0
C04	AGGCTCTTG	6	6	0	6	0
C02	TATGGGTGT	6	6	0	6	0
C02	TATGGCGT	6	6	0	6	0
B12	ACCTTGAAT	6	6	0	6	0
B10	GAACGTAGT	6	6	0	6	0
B07	CATCACG	6	6	0	6	0
B06	TCACGCTCT	6	6	0	6	0
B03	ATAGAGTCT	6	6	0	6	0
B02	CATGTTGAT	6	6	0	6	0
B01	TACTGCAGT	6	6	0	6	0
A12	CCGAATG	6	6	0	6	0
A05	TATCCAGT	6	1507	-99.6019	1507	-99.6019
H06	ACATAGTT	4	4	0	4	0
H06	ACATAG	4	4	0	4	0
H06	ACAATAGGT	4	4	0	4	0
H04	GTTCGGGAA	4	4	0	4	0
H04	GTCGGTAA	4	4	0	4	0
H04	GTCGGGAATT	4	4	0	4	0
H04	GTCGGAAA	4	4	0	4	0
H04	GGTCGGGAA	4	4	0	4	0
H04	GAAGCGAT	4	10216	-99.9608	10216	-99.9608
H04	CGTCGGGAA	4	4	0	4	0
H04	ATCGGGAA	4	4	0	4	0
H03	GGCTAGA	4	4	0	4	0
H03	GGCTAATA	4	4	0	4	0
H03	GCCTAAGA	4	4	0	4	0
H01	GAAGCGGAT	4	4	0	4	0
H01	GAAGCCGAT	4	4	0	4	0
G12	TTTACCGGGT	4	4	0	4	0
G12	TTACGGG	4	4	0	4	0
G10	AACACCATC	4	4	0	4	0
G06	GACTTCGCAT	4	4	0	4	0
G06	GACTCTGCA	4	4	0	4	0
G06	GACCTCGCA	4	4	0	4	0
G04	CTGACAA	4	4	0	4	0
G04	CTGAACAA	4	4	0	4	0
G01	TCCACACCCT	4	4	0	4	0
G01	TCCACACACC	4	4	0	4	0
F12	TAATTCTC	4	4	0	4	0
F12	GGAATTCTC	4	4	0	4	0
F10	CCAGTTAC	4	4	0	4	0
F09	ACTTAGCC	4	4	0	4	0
F07	ATTCCGACG	4	4	0	4	0
F04	TTGTACGAC	4	4	0	4	0
F04	TGTACGACC	4	4	0	4	0
F04	GTACGAC	4	4	0	4	0
F04	AGTACGAC	4	4	0	4	0
F03	GGGTGTCTT	4	4	0	4	0
E12	CTGTATG	4	4	0	4	0
E12	CCTGTAATG	4	4	0	4	0
E10	TCGTCAA	4	4	0	4	0
E10	TCCGTCA	4	4	0	4	0
E09	CGCTTCCG	4	4	0	4	0
E06	TTCTCTCCG	4	4	0	4	0
E06	TTCCTCGT	4	4	0	4	0
E03	TTTGCATGT	4	4	0	4	0
E01	AGGGAATGGT	4	4	0	4	0
E01	AGGGAATGG	4	4	0	4	0
D10	CATACTCCT	4	4	0	4	0
D06	ATTGGTAA	4	4	0	4	0
D06	ATTACCGA	4	5028	-99.9204	5028	-99.9204
D06	AATTGGCAA	4	4	0	4	0
D04	AGTGTTG	4	4	0	4	0
D03	ATTACCCGA	4	4	0	4	0
D01	TCTAGGA	4	4	0	4	0
D01	TCTAAGGGA	4	4	0	4	0
D01	TCTAAGA	4	4	0	4	0
C12	GTTATGC	4	4	0	4	0
C12	GTTAATGCTT	4	4	0	4	0
C10	CAACCTCAGT	4	4	0	4	0
C09	CTCCGGTTTTT	4	4	0	4	0
C09	CTCCGGATT	4	4	0	4	0
C06	GGTTAGGCA	4	4	0	4	0
C06	GGGTTAGCAT	4	4	0	4	0
C04	GGCTCTTGG	4	4	0	4	0
C04	GCTCTTGT	4	4	0	4	0
C03	CTGGCTCTTT	4	4	0	4	0
C03	CTGCTCT	4	4	0	4	0
C01	GTGTTCC	4	4	0	4	0
C01	GTGGTTCCC	4	4	0	4	0
B06	ATAGAGTC	4	376	-98.9362	376	-98.9362
B04	TAACCTCAT	4	4	0	4	0
A10	CGAAGCT	4	4	0	4	0
A09	GCTGAAGAT	4	4	0	4	0
A04	CAGTTCCA	4	536	-99.2537	536	-99.2537
A03	GAGATAACT	4	4	0	4	0
A03	AGATAAC	4	4	0	4	0
H11	GATGGACA	3	3	0	3	0
H11	GAGGGGACAT	3	3	0	3	0
H11	GAGGGACC	3	3	0	3	0
H11	GAGGGAC	3	3	0	3	0
H11	GAGAGGGACAT	3	3	0	3	0
H11	AGGGGACA	3	3	0	3	0
H11	AGGGAACAG	3	3	0	3	0
H08	GACGGCGAT	3	3	0	3	0
H08	CGACGGCGAT	3	3	0	3	0
H08	CACGGCGAT	3	3	0	3	0
H08	ACGGTCGATT	3	3	0	3	0
H08	ACGGGCGATT	3	3	0	3	0
H08	ACGGCGATTTT	3	3	0	3	0
H08	ACGGCGAA	3	3	0	3	0
H08	ACGCGAT	3	3	0	3	0
H08	ACCGGCGATT	3	3	0	3	0
H08	ACCGGCGAT	3	3	0	3	0
H05	TCAGGTAC	3	9154	-99.9672	9154	-99.9672
H05	TACAGGAT	3	3	0	3	0
H05	TACAAGGAT	3	3	0	3	0
H05	GTTCAGGA	3	3	0	3	0
H05	GTAGCAGGA	3	3	0	3	0
H05	GTACTGGA	3	3	0	3	0
H05	GTACTGA	3	3	0	3	0
H05	GTACCGGA	3	3	0	3	0
H05	GTACCCAGGA	3	3	0	3	0
H05	GTACATGGA	3	3	0	3	0
H05	GTACAGGATTT	3	3	0	3	0
H05	GTACAGGAAT	3	3	0	3	0
H05	GTACAGGAA	3	3	0	3	0
H05	GTACAGCGA	3	3	0	3	0
H05	GTACAGAC	3	3	0	3	0
H05	GTACACAGGA	3	3	0	3	0
H05	GGTACAGGAT	3	3	0	3	0
H05	GCTACAGGA	3	3	0	3	0
H05	GATACAGGA	3	3	0	3	0
H05	AGTACAGGA	3	3	0	3	0
H02	GAAAGGGTAT	3	3	0	3	0
H02	GAAAGGGTA	3	3	0	3	0
H02	CGAAAAAGGGTA	3	3	0	3	0
H02	AGAAAGGGTA	3	3	0	3	0
H02	AAGGGGTA	3	3	0	3	0
H02	AAAGGTTA	3	3	0	3	0
H02	AAAGGGTAC	3	3	0	3	0
H02	AAAGGGT	3	3	0	3	0
H02	AAAGGCGTA	3	3	0	3	0
H02	AAAAGGGTA	3	3	0	3	0
G11	GATATGGGA	3	3	0	3	0
G11	CGATATGGGA	3	3	0	3	0
G11	ATATTGGGA	3	3	0	3	0
G11	ATATGTGAA	3	3	0	3	0
G11	ATATGGGATT	3	3	0	3	0
G11	ATATGGAT	3	3	0	3	0
G11	ATATGGAG	3	3	0	3	0
G11	ATATGGAA	3	3	0	3	0
G11	ATAGGGA	3	3	0	3	0
G11	ATACTGGGA	3	3	0	3	0
G11	AATATGGGA	3	3	0	3	0
G08	TAGATTGT	3	3	0	3	0
G08	GAGATTGTTTT	3	3	0	3	0
G08	GAGATTGG	3	3	0	3	0
G08	GAGATGT	3	3	0	3	0
G08	GAAGATTGT	3	3	0	3	0
G05	TCGCGCAGA	3	3	0	3	0
G05	TCGCCGA	3	3	0	3	0
G05	TCGCCAGTA	3	3	0	3	0
G05	TCGCCAGC	3	3	0	3	0
G05	TCGCCAGAG	3	3	0	3	0
G05	TCGCCAGAATT	3	3	0	3	0
G05	TCGCCAG	3	3	0	3	0
G05	TCGCCACGAC	3	3	0	3	0
G05	TCGCCAAGA	3	3	0	3	0
G05	TCGCAGAT	3	3	0	3	0
G05	TCCCCAGA	3	3	0	3	0
G05	TCACCAGA	3	3	0	3	0
G05	TAGCCAGA	3	3	0	3	0
G05	GTCGCCAGA	3	3	0	3	0
G05	ACGCCAGAT	3	3	0	3	0
G02	CGCCCTT	3	3	0	3	0
G02	CGCCCACTTT	3	3	0	3	0
G02	CGCCCACTT	3	3	0	3	0
G02	CGCCAGCTT	3	3	0	3	0
G02	CGCCACTAT	3	3	0	3	0
G02	CGCCACCTT	3	3	0	3	0
G02	CGCCAC	3	3	0	3	0
G02	CGCACTT	3	3	0	3	0
G02	AGGCCACT	3	3	0	3	0
F11	GGGCTTCAA	3	3	0	3	0
F11	GGCTTCCAA	3	3	0	3	0
F11	GGCTTAAA	3	3	0	3	0
F11	GGCATTCAA	3	3	0	3	0
F11	GCTTCAAT	3	3	0	3	0
F08	GCAAGGAAAGT	3	3	0	3	0
F08	GCAAGAAGG	3	3	0	3	0
F08	GCAAGAAGAG	3	3	0	3	0
F08	GCAAGAAA	3	3	0	3	0
F05	TTGTAAGT	3	3	0	3	0
F05	TCTAAGTGAGT	3	3	0	3	0
F05	CTTTAAGT	3	3	0	3	0
F05	CTGTAGTT	3	3	0	3	0
F05	CTGTAGT	3	3	0	3	0
F05	CTGTAGAG	3	3	0	3	0
F05	CTGTACGT	3	3	0	3	0
F05	CTGTAAGTC	3	3	0	3	0
F05	CTGTAAGTA	3	3	0	3	0
F05	CTGTAAGGTTTT	3	3	0	3	0
F05	CTGTAAGGTT	3	3	0	3	0
F05	CTGTAAGG	3	3	0	3	0
F05	CTGTAAGCT	3	3	0	3	0
F05	CTGTAACGT	3	3	0	3	0
F05	CTGTAAAGT	3	3	0	3	0
F05	CTGTAAAG	3	3	0	3	0
F05	CGTAAGT	3	3	0	3	0
F05	CGCTGTAAGT	3	3	0	3	0
F05	CCTGTAAGT	3	3	0	3	0
F05	AGTGTAGT	3	3	0	3	0
F05	ACTGTAGGT	3	3	0	3	0
F02	CTGTAAGT	3	24889	-99.9879	24889	-99.9879
F02	AGTCTCC	3	3	0	3	0
F02	AGGTCTCA	3	3	0	3	0
F02	AGGGTCTCC	3	3	0	3	0
E11	CTTGCTCTC	3	3	0	3	0
E11	CTAGCCTC	3	3	0	3	0
E08	CACTGCTCCT	3	3	0	3	0
E08	CACTCTTCCTT	3	3	0	3	0
E08	CACTCTCCCT	3	3	0	3	0
E05	TTCTCGT	3	3	0	3	0
E05	TGTTCTCTCGT	3	3	0	3	0
E05	TGTTCTCCG	3	3	0	3	0
E05	TGGTTCTCG	3	3	0	3	0
E05	GTGTTCTCG	3	3	0	3	0
E02	GTCGACAC	3	3	0	3	0
E02	ACGCCAGC	3	3	0	3	0
E02	ACCAGCCAC	3	3	0	3	0
E02	ACCACTCAC	3	3	0	3	0
E02	ACCACACTAC	3	3	0	3	0
E02	ACCACACAC	3	3	0	3	0
E02	ACCACAC	3	3	0	3	0
E02	AACACCAC	3	3	0	3	0
D11	TTTCAGTAGT	3	3	0	3	0
D11	TTCAGTAAG	3	3	0	3	0
D11	TCAGTAG	3	3	0	3	0
D11	TCAGGTAG	3	3	0	3	0
D11	GTTTCAGTAG	3	3	0	3	0
D11	CTTCAGTAG	3	3	0	3	0
D11	AGTTCAGTAG	3	3	0	3	0
D08	TTGAAGGAT	3	3	0	3	0
D08	TGGGAAGGGAT	3	3	0	3	0
D08	TGAGGAT	3	3	0	3	0
D08	TGAAGGGAT	3	3	0	3	0
D08	TGAAGGAGTT	3	3	0	3	0
D08	TGAAGATT	3	3	0	3	0
D08	TAGAGGA	3	3	0	3	0
D08	GTGAAGGAT	3	3	0	3	0
D08	CTGAAGGAT	3	3	0	3	0
D08	CGAAGGAT	3	3	0	3	0
D08	AGTGAAGGAT	3	3	0	3	0
D08	AGAAGGAT	3	3	0	3	0
D05	GACGCTGTCT	3	3	0	3	0
D05	CGACGCTGTC	3	3	0	3	0
D05	AGACGCTGTC	3	3	0	3	0
D05	ACGCTGGTC	3	3	0	3	0
D05	ACGCTGCTC	3	3	0	3	0
D05	ACGACTGTC	3	3	0	3	0
D05	ACGACGCTGTC	3	3	0	3	0
D02	GCGAACTTCT	3	3	0	3	0
D02	CGGAACTTCT	3	3	0	3	0
D02	CGCGAACTTC	3	3	0	3	0
D02	CGAACTTTCT	3	3	0	3	0
D02	CGAACTTCTT	3	3	0	3	0
C11	CGTATAGT	3	3	0	3	0
C11	CGTAATAGA	3	3	0	3	0
C11	CGGTAATAG	3	3	0	3	0
C08	TTTGCTAGGT	3	3	0	3	0
C08	TTGTCTAGG	3	3	0	3	0
C08	TTGCCTAGG	3	3	0	3	0
C08	TGCTTGCTAGG	3	3	0	3	0
C08	TGCTAGG	3	3	0	3	0
C08	TATGGTGT	3	10268	-99.9708	10268	-99.9708
C08	GTGCTAGG	3	3	0	3	0
C05	CGGAACAGT	3	3	0	3	0
C05	CGACAGT	3	3	0	3	0
C05	CGACAG	3	3	0	3	0
C05	CGAACCAGT	3	3	0	3	0
C05	CGAACAGTTTT	3	3	0	3	0
C05	CGAACAGGTT	3	3	0	3	0
C05	CGAACAGGT	3	3	0	3	0
C05	CGAACAGG	3	3	0	3	0
C05	CGAACACAGT	3	3	0	3	0
C05	CGAACAAT	3	3	0	3	0
C05	CGAACAAGT	3	3	0	3	0
C05	CCAGAACAGT	3	3	0	3	0
C02	TATGTGTT	3	3	0	3	0
C02	TATGTGT	3	3	0	3	0
C02	TATGGTGTG	3	3	0	3	0
C02	TATGGGTG	3	3	0	3	0
C02	TATAGGTGT	3	3	0	3	0
C02	TACTGGTGT	3	3	0	3	0
C02	TAATGGTGT	3	3	0	3	0
C02	TAATGGTG	3	3	0	3	0
C02	GTATGGTGT	3	3	0	3	0
C02	AACTCGTG	3	3	0	3	0
B11	TTGTCACCG	3	3	0	3	0
B11	TGTCCACCG	3	3	0	3	0
B11	TGTCACCCG	3	3	0	3	0
B11	TGGTCACCG	3	3	0	3	0
B08	CTGACATCA	3	3	0	3	0
B08	CTGAATCAT	3	3	0	3	0
B05	ATTAGCTGA	3	3	0	3	0
A08	CCGTAAT	3	3	0	3	0
A05	ATTGCACCT	3	3	0	3	0
A05	ATGGCACCAT	3	3	0	3	0
A05	ATGCCACCTT	3	3	0	3	0
A05	ATGCACTCT	3	3	0	3	0
A05	ATGCACCCTT	3	3	0	3	0
A05	ATGCACCCT	3	3	0	3	0
A05	AATGCACCTT	3	3	0	3	0
H12	TCGTCTC	2	2	0	2	0
H12	TCGGTTTCC	2	2	0	2	0
H12	TCGGATTC	2	2	0	2	0
H12	TCGCGTTTC	2	2	0	2	0
H12	TAGGTTTC	2	2	0	2	0
H10	TCGTTTGGA	2	2	0	2	0
H10	TCGTTGAT	2	2	0	2	0
H10	GTCGTTTGA	2	2	0	2	0
H09	GGATGAAC	2	2	0	2	0
H09	GGATCGAAA	2	2	0	2	0
H09	GGAATGAAA	2	2	0	2	0
H09	GATGAGAA	2	2	0	2	0
H07	GGCTAGGGTT	2	2	0	2	0
H07	GGCTAGGGT	2	2	0	2	0
H07	GCTAGGTT	2	2	0	2	0
H07	GCTAGGGTG	2	2	0	2	0
H07	GCTAGGGGTTT	2	2	0	2	0
H07	GCCTAGGT	2	2	0	2	0
H07	GCCTAGG	2	2	0	2	0
H07	GCATAGGGT	2	2	0	2	0
H07	CTAGGGTT	2	2	0	2	0
H07	CTAGGG	2	2	0	2	0
H06	AGGTCTCC	2	9202	-99.9783	9202	-99.9783
H06	ACTGGCTC	2	2	0	2	0
H06	ACTAGGT	2	2	0	2	0
H06	ACCATAGGT	2	2	0	2	0
H06	ACATATGTT	2	2	0	2	0
H06	ACATATG	2	2	0	2	0
H06	ACATAGTAGGTT	2	2	0	2	0
H06	ACATAGGTGT	2	2	0	2	0
H06	ACATAGGG	2	2	0	2	0
H06	ACATAGCGGT	2	2	0	2	0
H06	ACATACGGT	2	2	0	2	0
H06	ACATAAGGTTT	2	2	0	2	0
H06	ACATAAGGT	2	2	0	2	0
H06	ACAAGGT	2	2	0	2	0
H06	AATCGGGAT	2	2	0	2	0
H06	AACTAGG	2	2	0	2	0
H04	TGTCGGGAA	2	2	0	2	0
H04	TCGGAA	2	2	0	2	0
H04	GTCTGGGAA	2	2	0	2	0
H04	GTCGCGGAA	2	2	0	2	0
H04	GTCGCGAA	2	2	0	2	0
H04	CTGGACAA	2	7154	-99.972	7154	-99.972
H04	CGGAAGGGAA	2	2	0	2	0
H03	GGCTTTAAGA	2	2	0	2	0
H03	GGCTTAGA	2	2	0	2	0
H03	GGCTATGA	2	2	0	2	0
H03	GGCTACGA	2	2	0	2	0
H03	GGCTACAGA	2	2	0	2	0
H03	GGCTAAGCT	2	2	0	2	0
H03	GGCTAAGCA	2	2	0	2	0
H03	GGCTAAAGA	2	2	0	2	0
H03	GGCGAAGA	2	2	0	2	0
H03	GCTAGAA	2	2	0	2	0
H03	CGGGCTAAGA	2	2	0	2	0
H02	GGAAAGTA	2	2	0	2	0
H01	TAGAAGCGAT	2	2	0	2	0
H01	GACGCGAT	2	2	0	2	0
H01	GAATAGCGACT	2	2	0	2	0
H01	GAAGGCGAT	2	2	0	2	0
H01	GAAGCGGATT	2	2	0	2	0
H01	GAAGCGAG	2	2	0	2	0
H01	GAAGCGAAT	2	2	0	2	0
H01	GAAGCAGAT	2	2	0	2	0
H01	GAAAGCGAT	2	2	0	2	0
H01	CGAAGCGA	2	2	0	2	0
H01	AAGCGATT	2	2	0	2	0
G12	TTACGGGT	2	2	0	2	0
G12	TTACGCGG	2	2	0	2	0
G12	TTACCGGT	2	2	0	2	0
G12	TTACCGGGGT	2	2	0	2	0
G12	TTACCCGGGT	2	2	0	2	0
G12	TTACCCGG	2	2	0	2	0
G12	TTACACCGGG	2	2	0	2	0
G12	GTTACCGGG	2	2	0	2	0
G10	AGACACATC	2	2	0	2	0
G10	AACTCATC	2	2	0	2	0
G10	AACCACATCT	2	2	0	2	0
G10	AACCACATC	2	2	0	2	0
G10	AACATGA	2	2	0	2	0
G10	AACACGATC	2	2	0	2	0
G10	AACACATCA	2	2	0	2	0
G10	AACACAATCT	2	2	0	2	0
G09	CGACACTGAGCT	2	2	0	2	0
G09	AGACTGAGCT	2	2	0	2	0
G09	AACTGGAGC	2	2	0	2	0
G09	AACTGCAGC	2	2	0	2	0
G09	AACTGATGC	2	2	0	2	0
G09	AACCTGAGC	2	2	0	2	0
G09	AAACTGAGC	2	2	0	2	0
G07	TCATCTG	2	2	0	2	0
G07	TATCATCTG	2	2	0	2	0
G07	TACATCTGTT	2	2	0	2	0
G07	TAATCTG	2	2	0	2	0
G06	GACTCTCGCAT	2	2	0	2	0
G06	GACTCTCGCA	2	2	0	2	0
G06	GACTCGGCA	2	2	0	2	0
G06	GACTCGCAA	2	2	0	2	0
G05	GATCGCCAGAT	2	2	0	2	0
G04	TGGACAA	2	2	0	2	0
G04	TCTGGACAA	2	2	0	2	0
G04	GCTGGACAA	2	2	0	2	0
G04	CTGGACAT	2	2	0	2	0
G04	CTGACACG	2	2	0	2	0
G04	CGGACAA	2	2	0	2	0
G04	CCTGGACAA	2	2	0	2	0
G03	TGAACACCG	2	2	0	2	0
G03	GGAACACCG	2	2	0	2	0
G03	GAACAGACCG	2	2	0	2	0
G03	GAACACG	2	2	0	2	0
G03	GAACACCGTTT	2	2	0	2	0
G03	GAACACCGGGT	2	2	0	2	0
G03	GAACACCGG	2	2	0	2	0
G03	GAACACCCGT	2	2	0	2	0
G03	GAACACACCGT	2	2	0	2	0
G03	GAACACACCG	2	2	0	2	0
G03	GAAAACCG	2	2	0	2	0
G03	AACACCCG	2	2	0	2	0
G01	TCCATCACCT	2	2	0	2	0
G01	TCCACCACCT	2	2	0	2	0
G01	TCCACCACC	2	2	0	2	0
G01	TCCACACTTCC	2	2	0	2	0
G01	TCCACACCC	2	2	0	2	0
G01	TCCACACAC	2	2	0	2	0
G01	TCCACAC	2	2	0	2	0
G01	TCACAGC	2	2	0	2	0
G01	TCACACCT	2	2	0	2	0
G01	GTCCACACCT	2	2	0	2	0
F12	GAATTTCTC	2	2	0	2	0
F12	GAATTCCTC	2	2	0	2	0
F12	GAATCTC	2	2	0	2	0
F12	GAAATTCTC	2	2	0	2	0
F10	CCCAGTCAC	2	2	0	2	0
F10	CCAGTCCACT	2	2	0	2	0
F10	CCAGTCCAC	2	2	0	2	0
F10	CCAGTCACTT	2	2	0	2	0
F10	ACAGTCAC	2	2	0	2	0
F09	ACGTAGCCC	2	2	0	2	0
F09	ACGTAGC	2	2	0	2	0
F09	ACGTAAGCC	2	2	0	2	0
F07	ATCCGACGACG	2	2	0	2	0
F07	ACTCCGACG	2	2	0	2	0
F06	TCCGGTAC	2	2	0	2	0
F06	TCAGTAC	2	2	0	2	0
F06	TCAGGTACC	2	2	0	2	0
F06	TCAGCGTAC	2	2	0	2	0
F06	TCAAGGTACT	2	2	0	2	0
F06	GTCAGGTAC	2	2	0	2	0
F06	CAGGTAC	2	2	0	2	0
F06	ATCAGGTAC	2	2	0	2	0
F06	ACAGGTAC	2	2	0	2	0
F04	TGTTACGAC	2	2	0	2	0
F04	TGTGACGAC	2	2	0	2	0
F04	TGTACGACTT	2	2	0	2	0
F04	TGTACCGAC	2	2	0	2	0
F04	TGTACAGAC	2	2	0	2	0
F04	TGGTACGAC	2	2	0	2	0
F03	GTGTGTCTT	2	2	0	2	0
F03	GTGTCTTT	2	2	0	2	0
F03	GTAGTCT	2	2	0	2	0
F03	GGTTGTCTT	2	2	0	2	0
F03	GGTGTCTG	2	2	0	2	0
F03	GGGTGTCT	2	2	0	2	0
F03	GGGGTGTCTT	2	2	0	2	0
F03	GAGGTGTCTT	2	2	0	2	0
F03	AGGTGTCTT	2	2	0	2	0
F01	GGAACGATT	2	2	0	2	0
F01	GGAACGAT	2	2	0	2	0
F01	GACACGATT	2	2	0	2	0
F01	GAACGATTTT	2	2	0	2	0
F01	AACGATCT	2	2	0	2	0
E12	GCCTGTATG	2	2	0	2	0
E12	CGCCTGTATG	2	2	0	2	0
E12	CCTGTCTG	2	2	0	2	0
E12	CCTGTAATGT	2	2	0	2	0
E12	CCGTATG	2	2	0	2	0
E12	CCCTGTATGT	2	2	0	2	0
E12	CCCGTATG	2	2	0	2	0
E12	ACCTGTATG	2	2	0	2	0
E10	TCCGTCACA	2	2	0	2	0
E10	TCCATCAA	2	2	0	2	0
E09	GGCTTCTG	2	2	0	2	0
E09	CTTCTG	2	2	0	2	0
E09	CGCTTCCTG	2	2	0	2	0
E09	CGCTGTCTG	2	2	0	2	0
E09	CGCTCTG	2	2	0	2	0
E09	CGCGCTTCTG	2	2	0	2	0
E09	CGCCTTCTG	2	2	0	2	0
E09	CCGCCTTCTG	2	2	0	2	0
E07	TCTCTATA	2	2	0	2	0
E07	TCCTCTATC	2	2	0	2	0
E07	GTCTCTATC	2	2	0	2	0
E07	CTTCTATCC	2	2	0	2	0
E06	TTCTCCGT	2	2	0	2	0
E06	TTCCTTCG	2	2	0	2	0
E06	TTCCTTCCTCCG	2	2	0	2	0
E06	TTCCTCTCG	2	2	0	2	0
E06	TTCCTCTCCG	2	2	0	2	0
E06	TTCCTCCTCCG	2	2	0	2	0
E06	TTCCTCCGTTT	2	2	0	2	0
E06	TTCCTCCGTT	2	2	0	2	0
E06	TTCCTCCGG	2	2	0	2	0
E06	TTCCTCCCGT	2	2	0	2	0
E06	TTCCCTCCGT	2	2	0	2	0
E06	TTCCATCG	2	2	0	2	0
E06	TGTTCCTCCG	2	2	0	2	0
E06	TCTCCGT	2	2	0	2	0
E06	TCTCCG	2	2	0	2	0
E06	ATCCTCCGT	2	2	0	2	0
E04	TCGATACGC	2	2	0	2	0
E04	GCGATACGC	2	2	0	2	0
E04	CGCGATACGC	2	2	0	2	0
E04	CGATTACGC	2	2	0	2	0
E04	CGATACGCTT	2	2	0	2	0
E04	CGATACCGC	2	2	0	2	0
E04	CGATAACGCT	2	2	0	2	0
E03	TTGCTTGT	2	2	0	2	0
E03	TTGCTGT	2	2	0	2	0
E03	TTGCCATGT	2	2	0	2	0
E03	TTGCAGTGT	2	2	0	2	0
E03	TGCAGGTAC	2	2	0	2	0
E01	GAGGGAATGG	2	2	0	2	0
E01	AGGATTGG	2	2	0	2	0
E01	AGGAATTGG	2	2	0	2	0
E01	AGGAATGT	2	2	0	2	0
E01	AGGAATGGTT	2	2	0	2	0
E01	AGGAATGGTC	2	2	0	2	0
E01	AGAATG	2	2	0	2	0
D12	AGGATTCC	2	2	0	2	0
D12	AGGATGGACCT	2	2	0	2	0
D12	AGGATGCCC	2	2	0	2	0
D12	AGGAGCC	2	2	0	2	0
D11	TTCAGTAGTT	2	2	0	2	0
D10	GCATACCTCT	2	2	0	2	0
D10	CTTACTCTT	2	2	0	2	0
D10	CATTACTCTT	2	2	0	2	0
D10	CATACCTCT	2	2	0	2	0
D10	CATACCT	2	2	0	2	0
D10	CAATACCTCT	2	2	0	2	0
D09	AGTCGAA	2	2	0	2	0
D07	CTAGGGATTT	2	2	0	2	0
D07	CTAGGATTTT	2	2	0	2	0
D07	CTAGGAA	2	2	0	2	0
D07	CTAGGA	2	2	0	2	0
D07	CTAGATT	2	2	0	2	0
D06	GATTGGCAAT	2	2	0	2	0
D06	GAATTGGCAA	2	2	0	2	0
D06	ATTGTCAC	2	2	0	2	0
D06	ATTGGCCAA	2	2	0	2	0
D06	ATTGGCAT	2	2	0	2	0
D06	ATTGGCAATT	2	2	0	2	0
D06	ATTGGCAATC	2	2	0	2	0
D06	ATTCGGCAA	2	2	0	2	0
D06	ATGCAA	2	2	0	2	0
D06	ATAGGCAA	2	2	0	2	0
D06	AATGGCAAT	2	2	0	2	0
D04	TGTACGACTG	2	2	0	2	0
D04	AGTTTGTTG	2	2	0	2	0
D04	AGTTGTTGTT	2	2	0	2	0
D04	AGTTGTTCG	2	2	0	2	0
D04	AGTTGTG	2	2	0	2	0
D04	AGTTGTCG	2	2	0	2	0
D04	AGATTGTTG	2	2	0	2	0
D03	ATTTACCGA	2	2	0	2	0
D03	ATTACGA	2	2	0	2	0
D03	ATTAACCGA	2	2	0	2	0
D03	ATCTACCGA	2	2	0	2	0
D03	AGTACCGA	2	2	0	2	0
D01	TCTATAAGGA	2	2	0	2	0
D01	TCTAGGAT	2	2	0	2	0
D01	TCTAATGGA	2	2	0	2	0
D01	TCTAAGGAA	2	2	0	2	0
D01	GTCTAGGA	2	2	0	2	0
D01	GTCTAAGGAT	2	2	0	2	0
D01	CTAAGGA	2	2	0	2	0
C12	TTTAATGCT	2	2	0	2	0
C12	GTTTAATGCTT	2	2	0	2	0
C12	GTTTAATGCT	2	2	0	2	0
C12	GTTTAATGC	2	2	0	2	0
C12	GTCTAATGC	2	2	0	2	0
C12	GTAATGCT	2	2	0	2	0
C12	GGTTTAATGC	2	2	0	2	0
C10	GCACCTCAG	2	2	0	2	0
C10	CCACCTCAG	2	2	0	2	0
C10	CACTCAG	2	2	0	2	0
C10	CACCTCTCAG	2	2	0	2	0
C10	CACCTCCG	2	2	0	2	0
C10	CACCTCAT	2	2	0	2	0
C10	CACCTCAGTT	2	2	0	2	0
C10	CACCTCAGG	2	2	0	2	0
C10	CACCCTCAG	2	2	0	2	0
C10	CAACCTCAG	2	2	0	2	0
C09	GCTCCGTTT	2	2	0	2	0
C09	CTTCCGGT	2	2	0	2	0
C09	CTCTCCGGTTT	2	2	0	2	0
C09	CTCGTT	2	2	0	2	0
C09	CTCGGT	2	2	0	2	0
C09	CTCCGT	2	2	0	2	0
C09	CTCCGGTTTTTT	2	2	0	2	0
C09	CTCCGGGTTT	2	2	0	2	0
C09	CCTCCGGTT	2	2	0	2	0
C07	AGACGCTGG	2	2	0	2	0
C07	AGACGCCTG	2	2	0	2	0
C07	AGAACGCTG	2	2	0	2	0
C06	TGTTAGCA	2	2	0	2	0
C06	GTTAGCAT	2	2	0	2	0
C06	GGTTTAGCA	2	2	0	2	0
C06	GGTTATGCA	2	2	0	2	0
C06	GGTTAGCATT	2	2	0	2	0
C06	GGTTAGCAA	2	2	0	2	0
C06	GAGTTAGCAT	2	2	0	2	0
C06	GAGTTAGCA	2	2	0	2	0
C04	GGGCTCTTGT	2	2	0	2	0
C04	GGCTCTTGTT	2	2	0	2	0
C04	GGCTCCTTG	2	2	0	2	0
C03	GCTGGCTCT	2	2	0	2	0
C03	CTGGCTCCT	2	2	0	2	0
C03	CATGGCTCT	2	2	0	2	0
C01	GTTGTTCC	2	2	0	2	0
C01	GTGTCTCG	2	2	0	2	0
C01	GTGGTTC	2	2	0	2	0
C01	GTGGTCC	2	2	0	2	0
C01	GTGGCTTCC	2	2	0	2	0
C01	AGGTGTTCC	2	2	0	2	0
B12	ACCCTTGAA	2	2	0	2	0
B10	GGAACGTAG	2	2	0	2	0
B10	GAAACGTAG	2	2	0	2	0
B10	AACGTAG	2	2	0	2	0
B09	AGGACGTT	2	2	0	2	0
B09	AGGACGT	2	2	0	2	0
B04	TAACCCTCA	2	2	0	2	0
B04	TAACCACA	2	2	0	2	0
B03	CGATAGAGTC	2	2	0	2	0
A12	GCCGATG	2	2	0	2	0
A12	GCCGAATTG	2	2	0	2	0
A12	GCCGAAATG	2	2	0	2	0
A09	GCGTGAAGA	2	2	0	2	0
A09	CTGAAGA	2	2	0	2	0
A06	CATGGAT	2	2	0	2	0
A06	CATGGAAG	2	2	0	2	0
A06	CATGAAT	2	2	0	2	0
A04	AGCTACT	2	2	0	2	0
A04	AGCCTCCAC	2	2	0	2	0
A04	AGCCCTACT	2	2	0	2	0
A03	GGAGATAAC	2	2	0	2	0
A01	CCTGAAC	2	2	0	2	0
A01	CCTGAAACC	2	2	0	2	0
